# Supplementary material for: BIOVERA-Tree: tree diversity, community composition, forest structure and functional traits along gradients of forest-use intensity and elevation in Veracruz, Mexico
Source: Biodivers Data J. 2021 Sep 9;9:e69560. doi: 10.3897/BDJ.9.e69560 (PMC8445910; doi:10.3897/BDJ.9.e69560)
Supplement: Supplementary material 1 — BIOVERA-Tree forest plots description [file bdj-09-e69560-s001.csv]

locationID	roundElevation	verbatimElevation	habitat	forestUseIntensity	verbatimLatitude	verbatimLongitude	temperature	precipitation	country	eventDate	coordinateUncertaintyInMeters	geodeticDatum
MaO1	10	28	Tropical semi-humid deciduous forest	OF	19.599526	-96.381482	25.4	1484	Mexico	2015-12-16	30	WGS84
MaO2	10	11	Tropical semi-humid deciduous forest	OF	19.593444	-96.380833	25.4	1466	Mexico	2015-12-17	30	WGS84
MaO3	10	13	Tropical semi-humid deciduous forest	OF	19.594945	-96.381419	25.4	1484	Mexico	2015-12-30	30	WGS84
MaO4	10	76	Tropical semi-humid deciduous forest	OF	19.605783	-96.375667	25.1	1552	Mexico	2015-12-30	30	WGS84
MaO5	10	18	Tropical semi-humid deciduous forest	OF	19.598069	-96.381472	25.4	1484	Mexico	2015-12-16	30	WGS84
MaD1	10	20	Tropical semi-humid deciduous forest	DF	19.595149	-96.379125	25.4	1484	Mexico	2015-12-29	30	WGS84
MaD2	10	14	Tropical semi-humid deciduous forest	DF	19.594471	-96.379116	25.4	1484	Mexico	2015-12-29/2015-12-30	30	WGS84
MaD3	10	11	Tropical semi-humid deciduous forest	DF	19.593944	-96.382222	25.4	1484	Mexico	2015-12-30	30	WGS84
MaD4	10	72	Tropical semi-humid deciduous forest	DF	19.61226	-96.384891	25.1	1606	Mexico	2015-06-18	30	WGS84
MaD5	10	90	Tropical semi-humid deciduous forest	DF	19.612866	-96.382649	25.1	1591	Mexico	2015-06-18	30	WGS84
MaS1	10	24	Tropical semi-humid deciduous forest	SF	19.611412	-96.400946	25	1647	Mexico	2015-12-29	30	WGS84
MaS2	10	26	Tropical semi-humid deciduous forest	SF	19.600584	-96.383512	25.2	1554	Mexico	2015-12-18	30	WGS84
MaS3	10	23	Tropical semi-humid deciduous forest	SF	19.610955	-96.401027	25	1647	Mexico	2015-12-29	30	WGS84
MaS4	10	23	Tropical semi-humid deciduous forest	SF	19.610568	-96.40121	25	1647	Mexico	2015-12-30	30	WGS84
MaS5	10	18	Tropical semi-humid deciduous forest	SF	19.606208	-96.401805	25.1	1654	Mexico	2015-12-30	30	WGS84
PaO1	500	632	Tropical semi-humid deciduous forest	OF	19.420291	-96.745407	22	1564	Mexico	2016-01-20	30	WGS84
PaO2	500	628	Tropical semi-humid deciduous forest	OF	19.419597	-96.745621	22	1564	Mexico	2016-01-20	30	WGS84
PaO3	500	632	Tropical semi-humid deciduous forest	OF	19.418964	-96.74582	22	1564	Mexico	2016-01-20	30	WGS84
PaO4	500	626	Tropical semi-humid deciduous forest	OF	19.421192	-96.745163	22	1564	Mexico	2016-01-21	30	WGS84
PaO5	500	637	Tropical semi-humid deciduous forest	OF	19.418659	-96.745962	22	1564	Mexico	2016-01-13	30	WGS84
PaD1	500	795	Tropical semi-humid deciduous forest	DF	19.421906	-96.745416	22	1564	Mexico	2016-01-20	30	WGS84
PaD2	500	644	Tropical semi-humid deciduous forest	DF	19.421643	-96.745648	22	1564	Mexico	2016-01-28	30	WGS84
PaD3	500	656	Tropical semi-humid deciduous forest	DF	19.421156	-96.746014	22	1564	Mexico	2016-01-20	30	WGS84
PaD4	500	655	Tropical semi-humid deciduous forest	DF	19.421502	-96.746091	22	1564	Mexico	2016-01-20	30	WGS84
PaD5	500	645	Tropical semi-humid deciduous forest	DF	19.41825	-96.746167	22	1564	Mexico	2016-01-28	30	WGS84
PaS1	500	675	Tropical semi-humid deciduous forest	DF	19.425545	-96.751441	22	1564	Mexico	2016-01-23	30	WGS84
PaS2	500	669	Tropical semi-humid deciduous forest	SF	19.425672	-96.750419	21.9	1552	Mexico	2015-01-23	30	WGS84
PaS3	500	673	Tropical semi-humid deciduous forest	SF	19.425268	-96.749846	21.9	1570	Mexico	2016-01-24	30	WGS84
PaS4	500	671	Tropical semi-humid deciduous forest	SF	19.424175	-96.749501	22	1564	Mexico	2015-01-23	30	WGS84
PaS5	500	685	Tropical semi-humid deciduous forest	SF	19.425727	-96.749785	21.9	1570	Mexico	2016-02-27	30	WGS84
ChO1	1000	996	Tropical oak forest	OF	19.41925	-96.796306	20.7	1594	Mexico	2015-12-26	30	WGS84
ChO2	1000	1008	Tropical oak forest	OF	19.419149	-96.796692	20.7	1594	Mexico	2015-12-26	30	WGS84
ChO3	1000	995	Tropical oak forest	OF	19.419333	-96.796528	20.7	1594	Mexico	2016-01-06	30	WGS84
ChO4	1000	1023	Tropical oak forest	OF	19.419056	-96.797083	20.7	1594	Mexico	2016-01-11	30	WGS84
ChO5	1000	1018	Tropical oak forest	OF	19.418901	-96.796525	20.7	1594	Mexico	2016-01-05	30	WGS84
ChD1	1000	985	Tropical oak forest	DF	19.419444	-96.795611	20.7	1594	Mexico	2016-01-06	30	WGS84
ChD2	1000	1008	Tropical oak forest	DF	19.419028	-96.795694	20.7	1594	Mexico	2016-01-05	30	WGS84
ChD3	1000	963	Tropical oak forest	DF	19.419274	-96.796167	20.7	1594	Mexico	2016-01-05	30	WGS84
ChD4	1000	937	Tropical oak forest	DF	19.420022	-96.796142	20.7	1594	Mexico	2016-01-06	30	WGS84
ChD5	1000	1019	Tropical oak forest	DF	19.419013	-96.795281	20.7	1594	Mexico	2015-12-27	30	WGS84
ChS1	1000	913	Tropical oak forest	SF	19.421611	-96.797111	20.7	1594	Mexico	2016-01-05	30	WGS84
ChS2	1000	921	Tropical oak forest	SF	19.421361	-96.796889	20.7	1594	Mexico	2015-12-22	30	WGS84
ChS3	1000	940	Tropical oak forest	SF	19.421472	-96.797222	20.7	1594	Mexico	2016-01-03	30	WGS84
ChS4	1000	941	Tropical oak forest	SF	19.420639	-96.796667	20.7	1594	Mexico	2015-12-26	30	WGS84
ChS5	1000	930	Tropical oak forest	SF	19.420889	-96.796556	20.7	1594	Mexico	2015-12-27	30	WGS84
CaO1	1500	1635	Humid montane forest	OF	19.517542	-97.003966	17.3	1628	Mexico	2015-02-07	30	WGS84
CaO2	1500	1640	Humid montane forest	OF	19.518019	-97.00434	17.3	1628	Mexico	2015-02-07	30	WGS84
CaO3	1500	1635	Humid montane forest	OF	19.517645	-97.004358	17.3	1628	Mexico	2016-12-08	30	WGS84
CaO4	1500	1651	Humid montane forest	OF	19.516653	-97.00773	17.3	1628	Mexico	2016-02-03	30	WGS84
CaO5	1500	1648	Humid montane forest	OF	19.516494	-97.007956	17.5	1638	Mexico	2016-02-13	30	WGS84
CaD1	1500	1542	Humid montane forest	DF	19.520583	-96.992639	18	1572	Mexico	2016-01-30	30	WGS84
CaD2	1500	1537	Humid montane forest	DF	19.520144	-96.992139	18	1572	Mexico	2016-02-06	30	WGS84
CaD3	1500	1519	Humid montane forest	DF	19.519933	-96.991314	18.4	1526	Mexico	2016-01-30	30	WGS84
CaD4	1500	1509	Humid montane forest	DF	19.520044	-96.990667	18.4	1526	Mexico	2015-02-06	30	WGS84
CaD5	1500	1501	Humid montane forest	DF	19.520217	-96.989833	18.4	1526	Mexico	2016-02-27	30	WGS84
CaS1	1500	1635	Humid montane forest	SF	19.516822	-97.002646	17.3	1628	Mexico	2016-12-09	30	WGS84
CaS2	1500	1636	Humid montane forest	SF	19.516472	-97.002111	17.5	1638	Mexico	2016-12-09	30	WGS84
CaS3	1500	1631	Humid montane forest	SF	19.516275	-97.00168	17.5	1638	Mexico	2016-12-08	30	WGS84
CaS4	1500	1620	Humid montane forest	SF	19.516209	-97.001131	17.5	1638	Mexico	2016-12-08	30	WGS84
CaS5	1500	1606	Humid montane forest	SF	19.516256	-97.000483	17.5	1638	Mexico	2016-12-09	30	WGS84
ZaO1	2000	2098	Humid montane forest	OF	19.526361	-97.033547	15.1	1830	Mexico	2016-06-15	30	WGS84
ZaO2	2000	2068	Humid montane forest	OF	19.522468	-97.035617	15.1	1830	Mexico	2016-02-02	30	WGS84
ZaO3	2000	2050	Humid montane forest	OF	19.524077	-97.033542	15.1	1830	Mexico	2016-02-03	30	WGS84
ZaO4	2000	2023	Humid montane forest	OF	19.519707	-97.030409	15.7	1803	Mexico	2016-02-02	30	WGS84
ZaO5	2000	2038	Humid montane forest	OF	19.519833	-97.03025	15.7	1803	Mexico	2016-02-03	30	WGS84
ZaD1	2000	1980	Humid montane forest	DF	19.522368	-97.035746	15.1	1830	Mexico	2016-06-14	30	WGS84
ZaD2	2000	2070	Humid montane forest	DF	19.52249	-97.034618	15.1	1830	Mexico	2016-06-14	30	WGS84
ZaD3	2000	2037	Humid montane forest	DF	19.520383	-97.033361	15.7	1803	Mexico	2016-06-14	30	WGS84
ZaD4	2000	2163	Humid montane forest	DF	19.520542	-97.033702	15.1	1830	Mexico	2016-06-15	30	WGS84
ZaD5	2000	2105	Humid montane forest	DF	19.520111	-97.031833	15.7	1803	Mexico	2016-02-02	30	WGS84
ZaS1	2000	2164	Humid montane forest	SF	19.522067	-97.03496	15.1	1830	Mexico	2016-02-03	30	WGS84
ZaS2	2000	2248	Humid montane forest	SF	19.5171	-97.033753	15.1	1830	Mexico	2016-01-12	30	WGS84
ZaS3	2000	2225	Humid montane forest	SF	19.517222	-97.032778	15.7	1803	Mexico	2016-02-12	30	WGS84
ZaS4	2000	2199	Humid montane forest	SF	19.517639	-97.032833	15.7	1803	Mexico	2016-02-12	30	WGS84
ZaS5	2000	2198	Humid montane forest	SF	19.517722	-97.032722	15.7	1803	Mexico	2016-02-12	30	WGS84
EnO1	2500	2504	Pine-oak forest	OF	19.521772	-97.055789	13.9	1803	Mexico	2016-06-15	30	WGS84
EnO2	2500	2553	Pine-oak forest	OF	19.521156	-97.057975	13.9	1803	Mexico	2016-02-02	30	WGS84
EnO3	2500	2565	Pine-oak forest	OF	19.520944	-97.058917	13.3	1772	Mexico	2016-02-03	30	WGS84
EnO4	2500	2510	Pine-oak forest	OF	19.521889	-97.055694	13.9	1803	Mexico	2016-02-02	30	WGS84
EnO5	2500	2575	Pine-oak forest	OF	19.52108	-97.059706	13.3	1772	Mexico	2016-02-03	30	WGS84
EnD1	2500	2518	Pine-oak forest	DF	19.520778	-97.054717	13.9	1803	Mexico	2016-06-14	30	WGS84
EnD2	2500	2487	Pine-oak forest	DF	19.521129	-97.055058	13.9	1803	Mexico	2016-06-14	30	WGS84
EnD3	2500	2489	Pine-oak forest	DF	19.521776	-97.054005	13.9	1803	Mexico	2016-06-14	30	WGS84
EnD4	2500	2492	Pine-oak forest	DF	19.521475	-97.056958	13.9	1803	Mexico	2016-06-15	30	WGS84
EnD5	2500	2496	Pine-oak forest	DF	19.521858	-97.054161	13.9	1803	Mexico	2016-02-02	30	WGS84
EnS1	2500	2504	Pine-oak forest	SF	19.520594	-97.052575	13.9	1803	Mexico	2016-02-03	30	WGS84
EnS2	2500	2511	Pine-oak forest	SF	19.520392	-97.052833	13.9	1803	Mexico	2016-01-12	30	WGS84
EnS3	2500	2514	Pine-oak forest	SF	19.519464	-97.0518	13.9	1803	Mexico	2016-02-12	30	WGS84
EnS4	2500	2568	Pine-oak forest	SF	19.517519	-97.054311	13.9	1803	Mexico	2016-02-12	30	WGS84
EnS5	2500	2547	Pine-oak forest	SF	19.516805	-97.053308	13.9	1803	Mexico	2016-02-12	30	WGS84
PeO1	3000	3014	Pine forest	OF	19.56161	-97.133214	11.6	1578	Mexico	2016-01-09	30	WGS84
PeO2	3000	3015	Pine forest	OF	19.563851	-97.132273	11.6	1578	Mexico	2016-01-09	30	WGS84
PeO3	3000	3099	Pine forest	OF	19.551528	-97.1325	11.4	1619	Mexico	2016-02-26	30	WGS84
PeO4	3000	3068	Pine forest	OF	19.555497	-97.133569	11.6	1578	Mexico	2016-01-09	30	WGS84
PeO5	3000	3025	Pine forest	OF	19.563078	-97.132072	11.6	1578	Mexico	2016-01-08	30	WGS84
PeD1	3000	3139	Pine forest	DF	19.547778	-97.131389	11.1	1642	Mexico	2015-12-23	30	WGS84
PeD2	3000	3103	Pine forest	DF	19.549944	-97.131806	11.4	1619	Mexico	2016-02-10	30	WGS84
PeD3	3000	3050	Pine forest	DF	19.555556	-97.1485	11.5	1557	Mexico	2016-02-10	30	WGS84
PeD4	3000	3107	Pine forest	DF	19.551417	-97.132083	11.4	1619	Mexico	2016-02-25	30	WGS84
PeD5	3000	3019	Pine forest	DF	19.561627	-97.13203	11.6	1578	Mexico	2016-01-09	30	WGS84
PeS1	3000	3130	Pine forest	SF	19.549333	-97.1305	11.1	1642	Mexico	2016-12-23	30	WGS84
PeS2	3000	3134	Pine forest	SF	19.549056	-97.130305	11.1	1642	Mexico	2016-12-23	30	WGS84
PeS3	3000	3119	Pine forest	SF	19.549472	-97.131389	11.1	1642	Mexico	2016-12-23	30	WGS84
PeS4	3000	3066	Pine forest	SF	19.553001	-97.136845	11.4	1597	Mexico	2016-02-10	30	WGS84
PeS5	3000	3116	Pine forest	SF	19.549361	-97.131833	11.1	1642	Mexico	2016-06-11	30	WGS84
CoO1	3500	3512	Fir forest	OF	19.518862	-97.154221	9.4	1560	Mexico	2016-06-16	30	WGS84
CoO2	3500	3522	Fir forest	OF	19.518555	-97.154254	9.4	1560	Mexico	2016-06-16	30	WGS84
CoO3	3500	3525	Fir forest	OF	19.518592	-97.154674	9.4	1560	Mexico	2016-06-16	30	WGS84
CoO4	3500	3537	Fir forest	OF	19.518219	-97.154525	9.4	1560	Mexico	2016-06-24	30	WGS84
CoO5	3500	3547	Fir forest	OF	19.518148	-97.154537	9.4	1560	Mexico	2016-06-22	30	WGS84
CoD1	3500	3508	Fir forest	DF	19.520048	-97.157931	9.4	1560	Mexico	2016-06-22	30	WGS84
CoD2	3500	3518	Fir forest	DF	19.519575	-97.157792	9.4	1560	Mexico	2015-12-05	30	WGS84
CoD3	3500	3530	Fir forest	DF	19.518492	-97.154828	9.4	1560	Mexico	2016-06-20	30	WGS84
CoD4	3500	3545	Fir forest	DF	19.518486	-97.157997	9.4	1560	Mexico	2016-06-22	30	WGS84
CoD5	3500	3535	Fir forest	DF	19.517922	-97.15452	9.4	1560	Mexico	2016-06-20	30	WGS84
CoS1	3500	3523	Fir forest	SF	19.519389	-97.159139	9.4	1510	Mexico	2016-06-22	30	WGS84
CoS2	3500	3522	Fir forest	SF	19.519733	-97.15917	9.4	1510	Mexico	2016-06-27	30	WGS84
CoS3	3500	3503	Fir forest	SF	19.520097	-97.159092	9.4	1510	Mexico	2016-06-23	30	WGS84
CoS4	3500	3506	Fir forest	SF	19.520069	-97.159602	9.4	1510	Mexico	2016-06-24	30	WGS84
CoS5	3500	3493	Fir forest	SF	19.520634	-97.157656	9.4	1560	Mexico	2016-06-24	30	WGS84
