# Supplementary material for: BIOVERA-Tree: tree diversity, community composition, forest structure and functional traits along gradients of forest-use intensity and elevation in Veracruz, Mexico
Source: Biodivers Data J. 2021 Sep 9;9:e69560. doi: 10.3897/BDJ.9.e69560 (PMC8445910; doi:10.3897/BDJ.9.e69560)
Supplement: Supplementary material 2 — BIOVERA-Tree scientific name [file bdj-09-e69560-s002.csv]

treeIdentificationID	treeIdentification	family
S_1	Abies hickelii Flous & Gaussen	Pinaceae
S_10	Alnus acuminata Kunth	Betulaceae
S_101	Miconia glaberrima (Schltdl.) Naudin	Melastomataceae
S_102	Mosannona depressa (Baill.) Chatrou	Annonaceae
S_103	Myrsine coriacea (Sw.) R. Br. ex Roem. & Schult.	Primulaceae
S_104	Nectandra salicifolia (Kunth) Nees	Lauraceae
S_105	Nectandra sp. 1	Lauraceae
S_106	Ocotea disjuncta Lorea-Hern.	Lauraceae
S_107	Ocotea effusa (Meisn.) Hemsl.	Lauraceae
S_11	Alnus jorullensis Kunth	Betulaceae
S_110	Oreopanax echinops (Schltdl. & Cham.) Decne. & Planch.	Araliaceae
S_111	Oreopanax flaccidus Marchal	Araliaceae
S_112	Oreopanax xalapensis (Kunth) Decne. & Planch.	Araliaceae
S_113	Osmanthus sp. 1	Oleaceae
S_114	Pachira aquatica Aubl.	Malvaceae
S_115	Perrottetia longistylis Rose	Dipentodontaceae
S_116	Persea chamissonis Mez	Lauraceae
S_117	Phyllonoma laticuspis (Turcz.) Engl.	Phyllonomaceae
S_118	Pimenta dioica (L.) Merr.	Myrtaceae
S_119	Pinus ayacahuite Ehrenb. ex Schltdl.	Pinaceae
S_12	Annona glabra L.	Annonaceae
S_121	Pinus montezumae Lamb.	Pinaceae
S_122	Pinus patula Schiede ex Schltdl. & Cham.	Pinaceae
S_123	Pinus pseudostrobus Lindl.	Pinaceae
S_125	Pinus teocote Schied. ex Schltdl. & Cham.	Pinaceae
S_126	Piper nudum C. DC	Piperaceae
S_127	Pouteria sp. 1	Sapotaceae
S_128	Protium copal (Schltdl. & Cham.) Engl.	Burseraceae
S_129	Prunus serotina Ehrh.	Rosaceae
S_13	Anonaceae sp. 2	Annonaceae
S_130	Prunus brachybotrya Zucc.	Rosaceae
S_131	Pseudobombax ellipticum (Kunth) Dugand	Malvaceae
S_134	Quercus affinis Scheidw.	Fagaceae
S_135	Quercus cortesii Liebm.	Fagaceae
S_136	Quercus corrugata Hook.	Fagaceae
S_137	Quercus delgadoana S. Valencia, Nixon & L.M. Kelly	Fagaceae
S_138	Quercus germana Schltdl. & Cham.	Fagaceae
S_139	Quercus lancifolia Schltdl. & Cham.	Fagaceae
S_14	Annona cherimola Mill.	Annonaceae
S_140	Quercus ocoteifolia Liebm.	Fagaceae
S_141	Quercus leiophylla A.DC.	Fagaceae
S_142	Quercus oleoides Schltdl. & Cham.	Fagaceae
S_143	Quercus peduncularis Née	Fagaceae
S_144	Quercus sapotifolia Liebm.	Fagaceae
S_145	Quercus sartorii Liebm.	Fagaceae
S_146	Quercus sp. 1	Fagaceae
S_147	Quercus sp. 2	Fagaceae
S_148	Quercus xalapensis Bonpl.	Fagaceae
S_15	Arbutus xalapensis Kunth	Ericaceae
S_150	Rhamnus humboldtiana Willd. ex Schult.	Rhamnaceae
S_151	Rhamnus sp. 1	Rhamnaceae
S_152	Rosaceae sp. 1	Rosaceae
S_153	Rubiaceae sp. 6	Rubiaceae
S_154	Rubiaceae sp. 2	Rubiaceae
S_155	Rubiaceae sp. 3	Rubiaceae
S_156	Rubiaceae sp. 4	Rubiaceae
S_157	Sageretia elegans (Kunth) Brongn.	Rhamnaceae
S_158	Salix humboldtiana Willd.	Salicaceae
S_159	Sambucus canadensis L.	Adoxaceae
S_16	Asteraceae sp. 1	Asteraceae
S_160	Sapium nitidum (Monach.) Lundell	Euphorbiaceae
S_161	Sapium sp. 1	Euphorbiaceae
S_162	Saurauia leucocarpa Schltdl.	Actinidiaceae
S_163	Saurauia sp. 1	Actinidiaceae
S_164	Sideroxylon salicifolium (L.) Lam.	Sapotaceae
S_165	Schaefferia frutescens Jacq.	Celastraceae
S_166	Senecio sp. 1	Asteraceae
S_167	Sideroxylon contrerasii (Lundell) T.D.Penn.	Sapotaceae
S_168	Solanum sp. 1	Solanaceae
S_169	Solanum sp. 2	Solanaceae
S_17	Asteraceae sp. 2	Asteraceae
S_170	Stemmadenia sp. 1	Apocynaceae
S_171	Stenostomum aromaticum (Cast.-Campos & Lorence) Borhidi	Rubiaceae
S_172	Styrax glabrescens Benth.	Styracaceae
S_173	Symplocos limoncillo Humb. & Bonpl.	Symplocaceae
S_174	Symplocos longipes Lundell	Symplocaceae
S_175	Symplocos speciosa Hemsl.	Symplocaceae
S_176	Tabebuia chrysantha (Jacq.) G.Nicholson	Bignoniaceae
S_177	Terminalia amazonia (J.F.Gmel.) Exell	Combretaceae
S_178	Ternstroemia sylvatica Schltdl. & Cham.	Pentaphylacaceae
S_179	Thevetia sp. 1	Apocynaceae
S_181	Tonduzia longifolia (A.DC.) Markgr.	Apocynaceae
S_182	Trema micrantha (L.) Blume	Cannabaceae
S_183	Trichilia havanensis Jacq.	Meliaceae
S_184	Trophis racemosa (L.) Urb.	Moraceae
S_185	Turpinia insignis (Kunth) Tul.	Staphyleaceae
S_186	Turpinia occidentalis (Sw.) G.Don	Staphyleaceae
S_187	Urera sp. 1	Urticaceae
S_188	Vaccinium leucanthum Schltdl.	Ericaceae
S_189	Weinmannia pinnata L.	Cunoniaceae
S_19	Adelia barbinervis Cham. & Schltdl.	Euphorbiaceae
S_190	Wimmeria concolor Cham. & Schltdl.	Celastraceae
S_192	Zanthoxylum melanostictum Schltdl. & Cham.	Rutaceae
S_193	Zinowiewia sp. 1	Celastraceae
S_195	Unidentified species 1
S_196	Unidentified species 2
S_2	Abies religiosa (Kunth) Schltdl. & Cham.	Pinaceae
S_20	Brosimum alicastrum Sw.	Moraceae
S_21	Buddleia sp. 1	Scrophulariaceae
S_211	Asteraceae sp. 3	Asteraceae
S_213	Celastraceae sp. 3	Celastraceae
S_22	Bursera simaruba (L.) Sarg.	Burseraceae
S_221	Unidentified species 221
S_222	Dendropanax sp. 1	Araliaceae
S_227	Lauraceae sp. 1	Lauraceae
S_228	Luehea candida (Moc. & Sessé ex DC.) Mart.	Malvaceae
S_229	Macadamia integrifolia Maiden & Betche	Proteaceae
S_23	Byrsonima crassifolia (L.) Kunth	Malpighiaceae
S_230	Manilkara zapota (L.) P.Royen	Sapotaceae
S_232	Unidentified species 232
S_233	Unidentified species 13
S_234	Unidentified species 14
S_235	Unidentified species 15
S_236	Unidentified species 20
S_238	Unidentified species 10
S_239	Unidentified species 11
S_24	Caesalpinia pulcherrima (L.) Sw.	Leguminosae
S_241	Unidentified species 3
S_242	Unidentified species 4
S_243	Unidentified species 5
S_244	Unidentified species 6
S_245	Unidentified species 7
S_246	Unidentified species 8
S_247	Unidentified species 9
S_248	Nectandra sp. 2	Lauraceae
S_25	Calyptranthes sp.	Myrtaceae
S_250	Oecopetalum mexicanum Greenm. & C.H. Thomps.	Icacinaceae
S_252	Palicourea sp. 1	Rubiaceae
S_253	Pinus hartwegii Lindl.	Pinaceae
S_254	Piper sp. 1	Piperaceae
S_257	Psychotria galeottiana (M.Martens) C.M.Taylor & Lorence	Rubiaceae
S_258	Psychotria perotensis Cast.-Campos	Rubiaceae
S_259	Psychotria sp. 3	Rubiaceae
S_26	Carpinus caroliniana Walter	Betulaceae
S_261	Roldana schaffneri (Sch.Bip. ex Klatt) H.Rob. & Brettell	Asteraceae
S_266	Schaefferia sp. 1	Celastraceae
S_269	Thymelaeaceae sp. 1	Thymelaeaceae
S_27	Casearia corymbosa Kunth	Salicaceae
S_271	Viburnum sp. 1	Adoxaceae
S_272	Zanthoxylum sp. 1	Rutaceae
S_28	Castilla sp. 1	Moraceae
S_29	Cecropia peltata L.	Urticaceae
S_297	Rosaceae sp. 2	Rosaceae
S_3	Vachellia cornigera (L.) Seigler & Ebinger	Leguminosae
S_30	Cedrela odorata L.	Meliaceae
S_31	Ceiba pentandra (L.) Gaertn.	Malvaceae
S_32	Celastraceae sp.2	Celastraceae
S_33	Celastraceae sp. 1	Celastraceae
S_34	Celtis caudata Planch.	Cannabaceae
S_35	Celtis iguanaea (Jacq.) Sarg.	Cannabaceae
S_36	Celtis monoica Hemsl.	Cannabaceae
S_37	Chiococca alba (L.) Hitchc.	Rubiaceae
S_38	Citrus reticulata Blanco	Rutaceae
S_39	Cinnamomum effusum (Meisn.) Kosterm.	Lauraceae
S_4	Vachellia pennatula (Schltdl. & Cham.) Seigler & Ebinger	Leguminosae
S_40	Cinnamomum pachypodum (Nees) Kosterm.	Lauraceae
S_41	Cinnamomum psychotrioides (Kunth) Kosterm.	Lauraceae
S_42	Citharexylum affine D.Don	Verbenaceae
S_43	Citharexylum hidalgense Moldenke	Verbenaceae
S_44	Clethra alcoceri Greenm.	Clethraceae
S_46	Clethra mexicana DC.	Clethraceae
S_47	Clethra occidentalis (L.) Kuntze	Clethraceae
S_48	Cleyera theoides (Sw.) Choisy	Clethraceae
S_49	Clusia sp. 1	Clusiaceae
S_5	Acacia sp. 1	Leguminosae
S_50	Coccoloba humboldtii Meisn.	Polygonaceae
S_51	Cochlospermum vitifolium (Willd.) Spreng.	Cochlospermaceae
S_52	Comocladia macrophylla (Hook. & Arn.) L.Riley	Anacardiaceae
S_53	Conostegia arborea Steud.	Melastomataceae
S_54	Crateva tapia L.	Capparaceae
S_55	Croton glabellus L.	Euphorbiaceae
S_56	Cupania dentata Moc. & Sessé ex DC.	Sapindaceae
S_57	Cupressus lusitanica var. benthamii (Endl.) Carrière	Cupressaceae
S_58	Dendropanax arboreus (L.) Decne. & Planch.	Araliaceae
S_59	Diospyros digyna Jacq.	Ebenaceae
S_6	Acacia sp. 2	Leguminosae
S_60	Diospyros oaxacana Standl.	Ebenaceae
S_61	Drymis sp. 1	Winteraceae
S_63	Diphysa americana (Mill.) M.Sousa	Leguminosae
S_64	Ehretia tinifolia L.	Boraginaceae
S_65	Eugenia capuli (Schltdl. & Cham.) Hook. & Arn.	Myrtaceae
S_66	Eugenia sp. 2	Myrtaceae
S_67	Eugenia naraveana Cházaro & Franc.-Gut.	Myrtaceae
S_68	Eupatorium sp. 1	Asteraceae
S_69	Euphorbiaceae sp. 1	Euphorbiaceae
S_7	Acalypha sp. 1	Euphorbiaceae
S_70	Exostema mexicanum A.Gray	Rubiaceae
S_71	Exothea copalillo (Schltdl.) Radlk.	Sapindaceae
S_72	Ficus cotinifolia Kunth	Moraceae
S_73	Ficus insipida Willd.	Moraceae
S_74	Ficus obtusifolia Kunth	Moraceae
S_75	Ficus sp. 1	Moraceae
S_76	Ficus sp. 2	Moraceae
S_77	Ficus sp. 3	Moraceae
S_78	Fraxinus dubia (Willd. ex Schult. & Schult.f.) P.S.Green & M.Nee	Oleaceae
S_79	Fraxinus schiedeana Cham. & Schltdl.	Oleaceae
S_8	Achatocarpus nigricans Triana	Achatocarpaceae
S_80	Gliricidia sepium (Jacq.) Walp.	Leguminosae
S_81	Guatteria sp. 1	Annonaceae
S_82	Guazuma ulmifolia Lam.	Malvaceae
S_83	Gyminda tonduzii Loes.	Celastraceae
S_84	Hedyosmum mexicanum C.Cordem.	Chloranthaceae
S_85	Heliocarpus americanus L.	Malvaceae
S_86	Ilex sp. 1	Aquifoliaceae
S_87	Inga sp. 1	Leguminosae
S_88	Inga sp. 2	Leguminosae
S_89	Jatropha sp.	Euphorbiaceae
S_9	Alchornea latifolia Sw.	Euphorbiaceae
S_90	Leucaena sp. 1	Leguminosae
S_91	Liquidambar styraciflua L.	Altingiaceae
S_92	Lonchocarpus sp 1.	Leguminosae
S_93	Lonchocarpus orizabensis Lundell	Leguminosae
S_95	Lysiloma divaricatum (Jacq.) J.F.Macbr.	Leguminosae
S_97	Maclura tinctoria (L.) D. Don ex Steud	Moraceae
S_98	Malvaceae sp. 1	Malvaceae
S_99	Mangifera indica L.	Anacardiaceae
