# Supplementary material for: BIOVERA-Tree: tree diversity, community composition, forest structure and functional traits along gradients of forest-use intensity and elevation in Veracruz, Mexico
Source: Biodivers Data J. 2021 Sep 9;9:e69560. doi: 10.3897/BDJ.9.e69560 (PMC8445910; doi:10.3897/BDJ.9.e69560)
Supplement: Supplementary material 4 — BIOVERA-Tree forest structure [file bdj-09-e69560-s004.csv]

locationID	treeIdentificationID	organismID	variableName	variableValue
PeD4	S_1	FS3777	diameterBreastHeight	30.9
PeD4	S_1	FS3778	diameterBreastHeight	29.2
CoO1	S_2	FS1248	diameterBreastHeight	50.6
CoO1	S_2	FS1249	diameterBreastHeight	12.1
CoO1	S_2	FS1250	diameterBreastHeight	12.7
CoO1	S_2	FS1251	diameterBreastHeight	50.7
CoO1	S_2	FS1252	diameterBreastHeight	134.4
CoO1	S_2	FS1253	diameterBreastHeight	43.9
CoO1	S_2	FS1254	diameterBreastHeight	22.7
CoO1	S_2	FS1255	diameterBreastHeight	64.6
CoO1	S_2	FS1256	diameterBreastHeight	51.2
CoO1	S_2	FS1257	diameterBreastHeight	43.3
CoO1	S_2	FS1258	diameterBreastHeight	47.4
CoO1	S_2	FS1259	diameterBreastHeight	8.3
CoO1	S_2	FS1260	diameterBreastHeight	13.1
CoO1	S_2	FS1261	diameterBreastHeight	27.5
CoO1	S_2	FS1262	diameterBreastHeight	22.8
CoO1	S_2	FS1263	diameterBreastHeight	93.8
CoO1	S_2	FS1264	diameterBreastHeight	54.7
CoO1	S_2	FS1265	diameterBreastHeight	57
CoO1	S_2	FS1266	diameterBreastHeight	9.2
CoO1	S_2	FS1267	diameterBreastHeight	81.7
CoO1	S_2	FS1268	diameterBreastHeight	46.6
CoO1	S_2	FS1269	diameterBreastHeight	32.6
CoO1	S_2	FS1270	diameterBreastHeight	31
CoO1	S_2	FS1271	diameterBreastHeight	25.5
CoO1	S_2	FS1272	diameterBreastHeight	46.5
CoO2	S_2	FS1273	diameterBreastHeight	31.5
CoO2	S_2	FS1274	diameterBreastHeight	42.7
CoO2	S_2	FS1275	diameterBreastHeight	19.2
CoO2	S_2	FS1276	diameterBreastHeight	26.6
CoO2	S_2	FS1277	diameterBreastHeight	34.2
CoO2	S_2	FS1278	diameterBreastHeight	19.1
CoO2	S_2	FS1279	diameterBreastHeight	26.6
CoO2	S_2	FS1280	diameterBreastHeight	13.8
CoO2	S_2	FS1281	diameterBreastHeight	29.3
CoO2	S_2	FS1282	diameterBreastHeight	64.1
CoO2	S_2	FS1283	diameterBreastHeight	18.1
CoO2	S_2	FS1284	diameterBreastHeight	9.5
CoO2	S_2	FS1285	diameterBreastHeight	19.5
CoO2	S_2	FS1286	diameterBreastHeight	16.4
CoO2	S_2	FS1287	diameterBreastHeight	31.5
CoO2	S_2	FS1288	diameterBreastHeight	94.4
CoO2	S_2	FS1289	diameterBreastHeight	40
CoO2	S_2	FS1290	diameterBreastHeight	83
CoO2	S_2	FS1291	diameterBreastHeight	22.4
CoO2	S_2	FS1292	diameterBreastHeight	42.8
CoO2	S_2	FS1293	diameterBreastHeight	14
CoO2	S_2	FS1294	diameterBreastHeight	30.9
CoO2	S_2	FS1295	diameterBreastHeight	35.5
CoO2	S_2	FS1296	diameterBreastHeight	15.4
CoO2	S_2	FS1297	diameterBreastHeight	14.5
CoO2	S_2	FS1298	diameterBreastHeight	54.1
CoO2	S_2	FS1299	diameterBreastHeight	22.6
CoO2	S_2	FS1300	diameterBreastHeight	12.1
CoO2	S_2	FS1301	diameterBreastHeight	39.9
CoO2	S_2	FS1302	diameterBreastHeight	43.5
CoO2	S_2	FS1303	diameterBreastHeight	10.7
CoO2	S_2	FS1304	diameterBreastHeight	15.2
CoO2	S_2	FS1305	diameterBreastHeight	19.9
CoO2	S_2	FS1306	diameterBreastHeight	6.6
CoO2	S_2	FS1307	diameterBreastHeight	13.1
CoO2	S_2	FS1308	diameterBreastHeight	44.2
CoO3	S_2	FS1309	diameterBreastHeight	12.7
CoO3	S_2	FS1310	diameterBreastHeight	8.9
CoO3	S_2	FS1311	diameterBreastHeight	50.9
CoO3	S_2	FS1313	diameterBreastHeight	14.3
CoO3	S_2	FS1314	diameterBreastHeight	29
CoO3	S_2	FS1315	diameterBreastHeight	16.6
CoO3	S_2	FS1316	diameterBreastHeight	19.4
CoO3	S_2	FS1317	diameterBreastHeight	56.2
CoO3	S_2	FS1318	diameterBreastHeight	30.2
CoO3	S_2	FS1319	diameterBreastHeight	32.7
CoO3	S_2	FS1320	diameterBreastHeight	19.4
CoO3	S_2	FS1321	diameterBreastHeight	56.2
CoO3	S_2	FS1322	diameterBreastHeight	30.2
CoO3	S_2	FS1323	diameterBreastHeight	32.7
CoO3	S_2	FS1324	diameterBreastHeight	36.9
CoO3	S_2	FS1325	diameterBreastHeight	14.5
CoO3	S_2	FS1326	diameterBreastHeight	18.5
CoO3	S_2	FS1327	diameterBreastHeight	9.4
CoO3	S_2	FS1328	diameterBreastHeight	25
CoO3	S_2	FS1329	diameterBreastHeight	38
CoO3	S_2	FS1330	diameterBreastHeight	59
CoO4	S_2	FS1331	diameterBreastHeight	36.7
CoO4	S_2	FS1332	diameterBreastHeight	50.1
CoO4	S_2	FS1333	diameterBreastHeight	28.2
CoO4	S_2	FS1334	diameterBreastHeight	22.7
CoO4	S_2	FS1335	diameterBreastHeight	57.3
CoO4	S_2	FS1336	diameterBreastHeight	34.7
CoO4	S_2	FS1337	diameterBreastHeight	18.7
CoO4	S_2	FS1338	diameterBreastHeight	59.3
CoO4	S_2	FS1339	diameterBreastHeight	28.9
CoO4	S_2	FS1340	diameterBreastHeight	52.2
CoO4	S_2	FS1341	diameterBreastHeight	29
CoO4	S_2	FS1342	diameterBreastHeight	48
CoO4	S_2	FS1343	diameterBreastHeight	17.8
CoO4	S_2	FS1344	diameterBreastHeight	26.1
CoO4	S_2	FS1345	diameterBreastHeight	16.3
CoO4	S_2	FS1346	diameterBreastHeight	43.7
CoO4	S_2	FS1347	diameterBreastHeight	35.1
CoO4	S_2	FS1348	diameterBreastHeight	16.3
CoO4	S_2	FS1349	diameterBreastHeight	47.9
CoO4	S_2	FS1350	diameterBreastHeight	50
CoO4	S_2	FS1351	diameterBreastHeight	13.8
CoO4	S_2	FS1352	diameterBreastHeight	14.8
CoO4	S_2	FS1353	diameterBreastHeight	10
CoO4	S_2	FS1354	diameterBreastHeight	28.7
CoO4	S_2	FS1355	diameterBreastHeight	27.4
CoO4	S_2	FS1356	diameterBreastHeight	50.1
CoO4	S_2	FS1357	diameterBreastHeight	18.3
CoO4	S_2	FS1358	diameterBreastHeight	73.3
CoO4	S_2	FS1359	diameterBreastHeight	37.4
CoO4	S_2	FS1360	diameterBreastHeight	35.4
CoO5	S_2	FS1361	diameterBreastHeight	28.6
CoO5	S_2	FS1362	diameterBreastHeight	14.5
CoO5	S_2	FS1363	diameterBreastHeight	12.7
CoO5	S_2	FS1364	diameterBreastHeight	47.4
CoO5	S_2	FS1365	diameterBreastHeight	7.7
CoO5	S_2	FS1366	diameterBreastHeight	37
CoO5	S_2	FS1367	diameterBreastHeight	9.7
CoO5	S_2	FS1368	diameterBreastHeight	42.9
CoO5	S_2	FS1369	diameterBreastHeight	18.7
CoO5	S_2	FS1370	diameterBreastHeight	22.7
CoO5	S_2	FS1371	diameterBreastHeight	24.8
CoO5	S_2	FS1372	diameterBreastHeight	57.4
CoO5	S_2	FS1373	diameterBreastHeight	19.5
CoO5	S_2	FS1374	diameterBreastHeight	22.5
CoO5	S_2	FS1375	diameterBreastHeight	13.2
CoO5	S_2	FS1376	diameterBreastHeight	6.4
CoO5	S_2	FS1377	diameterBreastHeight	7.4
CoO5	S_2	FS1378	diameterBreastHeight	22.2
CoO5	S_2	FS1379	diameterBreastHeight	29.2
CoO5	S_2	FS1380	diameterBreastHeight	39.8
CoO5	S_2	FS1381	diameterBreastHeight	12.7
CoO5	S_2	FS1382	diameterBreastHeight	52.8
CoO5	S_2	FS1383	diameterBreastHeight	28.5
CoO5	S_2	FS1384	diameterBreastHeight	6.5
CoO5	S_2	FS1385	diameterBreastHeight	27.2
CoO5	S_2	FS1386	diameterBreastHeight	11.1
CoO5	S_2	FS1387	diameterBreastHeight	45.6
CoO5	S_2	FS1388	diameterBreastHeight	36.1
CoO5	S_2	FS1389	diameterBreastHeight	18.8
CoO5	S_2	FS1390	diameterBreastHeight	31.7
CoO5	S_2	FS1391	diameterBreastHeight	47.6
CoO5	S_2	FS1392	diameterBreastHeight	46.9
CoO5	S_2	FS1393	diameterBreastHeight	24.8
CoO5	S_2	FS1394	diameterBreastHeight	37.4
CoO5	S_2	FS1395	diameterBreastHeight	21.5
CoO5	S_2	FS1396	diameterBreastHeight	39.2
CoO5	S_2	FS1397	diameterBreastHeight	8
CoO5	S_2	FS1398	diameterBreastHeight	43.6
CoO5	S_2	FS1399	diameterBreastHeight	10.3
CoO5	S_2	FS1400	diameterBreastHeight	7.2
CoO5	S_2	FS1401	diameterBreastHeight	27.2
CoO5	S_2	FS1402	diameterBreastHeight	8
CoD1	S_2	FS1403	diameterBreastHeight	17.5
CoD1	S_2	FS1404	diameterBreastHeight	20.8
CoD1	S_2	FS1405	diameterBreastHeight	10.1
CoD1	S_2	FS1406	diameterBreastHeight	5.7
CoD1	S_2	FS1407	diameterBreastHeight	19.4
CoD1	S_2	FS1408	diameterBreastHeight	14
CoD1	S_2	FS1409	diameterBreastHeight	13
CoD1	S_2	FS1410	diameterBreastHeight	45.2
CoD1	S_2	FS1411	diameterBreastHeight	6.8
CoD1	S_2	FS1412	diameterBreastHeight	5
CoD1	S_2	FS1413	diameterBreastHeight	35.9
CoD1	S_2	FS1414	diameterBreastHeight	79.6
CoD1	S_2	FS1415	diameterBreastHeight	56.6
CoD1	S_2	FS1416	diameterBreastHeight	55.7
CoD1	S_2	FS1417	diameterBreastHeight	31.4
CoD1	S_2	FS1418	diameterBreastHeight	62.7
CoD1	S_2	FS1419	diameterBreastHeight	8.6
CoD1	S_2	FS1420	diameterBreastHeight	14.8
CoD1	S_2	FS1421	diameterBreastHeight	27.7
CoD1	S_2	FS1422	diameterBreastHeight	69
CoD1	S_2	FS1423	diameterBreastHeight	50.9
CoD2	S_2	FS1424	diameterBreastHeight	8.4
CoD2	S_2	FS1425	diameterBreastHeight	6.1
CoD2	S_2	FS1426	diameterBreastHeight	24.1
CoD2	S_2	FS1427	diameterBreastHeight	6.4
CoD2	S_2	FS1428	diameterBreastHeight	33.7
CoD2	S_2	FS1429	diameterBreastHeight	19
CoD2	S_2	FS1430	diameterBreastHeight	31.4
CoD2	S_2	FS1431	diameterBreastHeight	36.1
CoD2	S_2	FS1432	diameterBreastHeight	20.2
CoD2	S_2	FS1433	diameterBreastHeight	12
CoD2	S_2	FS1434	diameterBreastHeight	40.6
CoD2	S_2	FS1435	diameterBreastHeight	19.7
CoD2	S_2	FS1436	diameterBreastHeight	6.7
CoD2	S_2	FS1437	diameterBreastHeight	5.8
CoD2	S_2	FS1438	diameterBreastHeight	9.5
CoD2	S_2	FS1439	diameterBreastHeight	16.4
CoD2	S_2	FS1440	diameterBreastHeight	46.5
CoD2	S_2	FS1441	diameterBreastHeight	35.3
CoD2	S_2	FS1442	diameterBreastHeight	10.6
CoD2	S_2	FS1443	diameterBreastHeight	39.2
CoD2	S_2	FS1444	diameterBreastHeight	30.9
CoD2	S_2	FS1445	diameterBreastHeight	9.2
CoD2	S_2	FS1446	diameterBreastHeight	29.8
CoD2	S_2	FS1447	diameterBreastHeight	75.1
CoD2	S_2	FS1448	diameterBreastHeight	12.4
CoD2	S_2	FS1450	diameterBreastHeight	18.8
CoD2	S_2	FS1451	diameterBreastHeight	42.7
CoD2	S_2	FS1452	diameterBreastHeight	16.9
CoD2	S_2	FS1453	diameterBreastHeight	40.6
CoD2	S_2	FS1454	diameterBreastHeight	42.8
CoD2	S_2	FS1455	diameterBreastHeight	50.6
CoD2	S_2	FS1456	diameterBreastHeight	28
CoD2	S_2	FS1457	diameterBreastHeight	8.2
CoD2	S_2	FS1458	diameterBreastHeight	5.6
CoD2	S_2	FS1460	diameterBreastHeight	6.1
CoD2	S_2	FS1461	diameterBreastHeight	21.8
CoD2	S_2	FS1462	diameterBreastHeight	10.1
CoD2	S_2	FS1463	diameterBreastHeight	8.4
CoD2	S_2	FS1464	diameterBreastHeight	16.1
CoD2	S_2	FS1465	diameterBreastHeight	21.9
CoD2	S_2	FS1466	diameterBreastHeight	6.5
CoD2	S_2	FS1467	diameterBreastHeight	8.1
CoD2	S_2	FS1468	diameterBreastHeight	23.4
CoD2	S_2	FS1469	diameterBreastHeight	9.4
CoD2	S_2	FS1470	diameterBreastHeight	29.8
CoD2	S_2	FS1471	diameterBreastHeight	9.1
CoD2	S_2	FS1472	diameterBreastHeight	6.4
CoD2	S_2	FS1473	diameterBreastHeight	6.7
CoD2	S_2	FS1474	diameterBreastHeight	8
CoD3	S_2	FS1475	diameterBreastHeight	73.2
CoD3	S_2	FS1476	diameterBreastHeight	27.4
CoD3	S_2	FS1477	diameterBreastHeight	14.2
CoD3	S_2	FS1478	diameterBreastHeight	57.8
CoD3	S_2	FS1479	diameterBreastHeight	35.9
CoD3	S_2	FS1480	diameterBreastHeight	45.5
CoD3	S_2	FS1481	diameterBreastHeight	18.6
CoD3	S_2	FS1482	diameterBreastHeight	14.7
CoD3	S_2	FS1483	diameterBreastHeight	45.5
CoD3	S_2	FS1484	diameterBreastHeight	12
CoD3	S_2	FS1485	diameterBreastHeight	19.4
CoD3	S_2	FS1486	diameterBreastHeight	8.1
CoD3	S_2	FS1487	diameterBreastHeight	38.2
CoD3	S_2	FS1488	diameterBreastHeight	18.9
CoD3	S_2	FS1489	diameterBreastHeight	17
CoD3	S_2	FS1490	diameterBreastHeight	55.4
CoD3	S_2	FS1491	diameterBreastHeight	8.8
CoD3	S_2	FS1492	diameterBreastHeight	18.5
CoD3	S_2	FS1493	diameterBreastHeight	10.5
CoD3	S_2	FS1494	diameterBreastHeight	59.8
CoD3	S_2	FS1495	diameterBreastHeight	49.7
CoD3	S_2	FS1496	diameterBreastHeight	19.7
CoD3	S_2	FS1497	diameterBreastHeight	27.4
CoD3	S_2	FS1498	diameterBreastHeight	16.2
CoD3	S_2	FS1499	diameterBreastHeight	30.4
CoD3	S_2	FS1500	diameterBreastHeight	10.6
CoD3	S_2	FS1501	diameterBreastHeight	19.8
CoD3	S_2	FS1502	diameterBreastHeight	54.8
CoD3	S_2	FS1503	diameterBreastHeight	22.9
CoD3	S_2	FS1504	diameterBreastHeight	20.3
CoD3	S_2	FS1505	diameterBreastHeight	55.3
CoD3	S_2	FS1506	diameterBreastHeight	10.5
CoD3	S_2	FS1507	diameterBreastHeight	13.5
CoD3	S_2	FS1508	diameterBreastHeight	46.8
CoD3	S_2	FS1509	diameterBreastHeight	14.3
CoD3	S_2	FS1510	diameterBreastHeight	10.9
CoD3	S_2	FS1511	diameterBreastHeight	20.5
CoD3	S_2	FS1512	diameterBreastHeight	52.7
CoD3	S_2	FS1513	diameterBreastHeight	32.8
CoD3	S_2	FS1514	diameterBreastHeight	41.4
CoD3	S_2	FS1515	diameterBreastHeight	26.7
CoD4	S_2	FS1516	diameterBreastHeight	15.6
CoD4	S_2	FS1517	diameterBreastHeight	12.3
CoD4	S_2	FS1518	diameterBreastHeight	8.1
CoD4	S_2	FS1519	diameterBreastHeight	6
CoD4	S_2	FS1520	diameterBreastHeight	10.5
CoD4	S_2	FS1521	diameterBreastHeight	8.8
CoD4	S_2	FS1522	diameterBreastHeight	73.1
CoD4	S_2	FS1523	diameterBreastHeight	13.5
CoD4	S_2	FS1524	diameterBreastHeight	7
CoD4	S_2	FS1525	diameterBreastHeight	17.3
CoD4	S_2	FS1526	diameterBreastHeight	6.4
CoD4	S_2	FS1527	diameterBreastHeight	5.7
CoD4	S_2	FS1528	diameterBreastHeight	7.8
CoD4	S_2	FS1529	diameterBreastHeight	7.4
CoD4	S_2	FS1530	diameterBreastHeight	6.3
CoD4	S_2	FS1531	diameterBreastHeight	19.1
CoD4	S_2	FS1532	diameterBreastHeight	20.6
CoD4	S_2	FS1533	diameterBreastHeight	21.3
CoD4	S_2	FS1534	diameterBreastHeight	12.4
CoD4	S_2	FS1535	diameterBreastHeight	10.3
CoD4	S_2	FS1536	diameterBreastHeight	5.4
CoD4	S_2	FS1537	diameterBreastHeight	12.5
CoD4	S_2	FS1538	diameterBreastHeight	7.2
CoD4	S_2	FS1539	diameterBreastHeight	8.9
CoD4	S_2	FS1540	diameterBreastHeight	9.5
CoD4	S_2	FS1541	diameterBreastHeight	9.2
CoD4	S_2	FS1542	diameterBreastHeight	6.6
CoD4	S_2	FS1543	diameterBreastHeight	6.4
CoD4	S_2	FS1544	diameterBreastHeight	7.3
CoD4	S_2	FS1545	diameterBreastHeight	7.6
CoD4	S_2	FS1546	diameterBreastHeight	9.3
CoD4	S_2	FS1547	diameterBreastHeight	93.9
CoD4	S_2	FS1548	diameterBreastHeight	6.1
CoD4	S_2	FS1549	diameterBreastHeight	6.4
CoD4	S_2	FS1550	diameterBreastHeight	5.7
CoD4	S_2	FS1551	diameterBreastHeight	79.6
CoD4	S_2	FS1552	diameterBreastHeight	34.6
CoD4	S_2	FS1553	diameterBreastHeight	33.4
CoD4	S_2	FS1554	diameterBreastHeight	8.1
CoD4	S_2	FS1555	diameterBreastHeight	13.4
CoD4	S_2	FS1556	diameterBreastHeight	12.5
CoD4	S_2	FS1557	diameterBreastHeight	7.5
CoD4	S_2	FS1558	diameterBreastHeight	76.7
CoD4	S_2	FS1559	diameterBreastHeight	18.8
CoD4	S_2	FS1560	diameterBreastHeight	7
CoD4	S_2	FS1561	diameterBreastHeight	19
CoD5	S_2	FS1562	diameterBreastHeight	19.7
CoD5	S_2	FS1563	diameterBreastHeight	9.3
CoD5	S_2	FS1564	diameterBreastHeight	11
CoD5	S_2	FS1566	diameterBreastHeight	33.1
CoD5	S_2	FS1567	diameterBreastHeight	32.7
CoD5	S_2	FS1568	diameterBreastHeight	37.3
CoD5	S_2	FS1569	diameterBreastHeight	8.1
CoD5	S_2	FS1570	diameterBreastHeight	22
CoD5	S_2	FS1571	diameterBreastHeight	34.1
CoD5	S_2	FS1572	diameterBreastHeight	6.2
CoD5	S_2	FS1573	diameterBreastHeight	5.5
CoD5	S_2	FS1574	diameterBreastHeight	5.5
CoD5	S_2	FS1575	diameterBreastHeight	6.5
CoD5	S_2	FS1576	diameterBreastHeight	5.7
CoD5	S_2	FS1577	diameterBreastHeight	5
CoD5	S_2	FS1578	diameterBreastHeight	7.7
CoD5	S_2	FS1579	diameterBreastHeight	10
CoD5	S_2	FS1580	diameterBreastHeight	22.7
CoD5	S_2	FS1581	diameterBreastHeight	8
CoD5	S_2	FS1582	diameterBreastHeight	13.9
CoD5	S_2	FS1583	diameterBreastHeight	7
CoD5	S_2	FS1584	diameterBreastHeight	18.9
CoD5	S_2	FS1585	diameterBreastHeight	7.7
CoD5	S_2	FS1586	diameterBreastHeight	57
CoD5	S_2	FS1588	diameterBreastHeight	22
CoD5	S_2	FS1589	diameterBreastHeight	27.8
CoD5	S_2	FS1590	diameterBreastHeight	7
CoD5	S_2	FS1591	diameterBreastHeight	11.5
CoD5	S_2	FS1592	diameterBreastHeight	5.7
CoD5	S_2	FS1593	diameterBreastHeight	5.8
CoD5	S_2	FS1594	diameterBreastHeight	20
CoD5	S_2	FS1595	diameterBreastHeight	18
CoD5	S_2	FS1596	diameterBreastHeight	27.5
CoD5	S_2	FS1597	diameterBreastHeight	14.8
CoD5	S_2	FS1598	diameterBreastHeight	34.1
CoD5	S_2	FS1599	diameterBreastHeight	60
CoD5	S_2	FS1600	diameterBreastHeight	8.6
CoD5	S_2	FS1602	diameterBreastHeight	23
CoD5	S_2	FS1603	diameterBreastHeight	33
CoD5	S_2	FS1604	diameterBreastHeight	28.3
CoD5	S_2	FS1605	diameterBreastHeight	23.5
CoD5	S_2	FS1606	diameterBreastHeight	14.5
CoD5	S_2	FS1607	diameterBreastHeight	14.3
CoD5	S_2	FS1608	diameterBreastHeight	9.3
CoD5	S_2	FS1609	diameterBreastHeight	30.3
CoD5	S_2	FS1610	diameterBreastHeight	6.7
CoD5	S_2	FS1611	diameterBreastHeight	5.7
CoD5	S_2	FS1612	diameterBreastHeight	28.3
CoD5	S_2	FS1613	diameterBreastHeight	6.7
CoD5	S_2	FS1614	diameterBreastHeight	26
CoS1	S_2	FS1622	diameterBreastHeight	12.6
CoS1	S_2	FS1634	diameterBreastHeight	9.9
CoS1	S_2	FS1637	diameterBreastHeight	26.8
CoS1	S_2	FS1664	diameterBreastHeight	5.6
CoS1	S_2	FS1665	diameterBreastHeight	12.1
CoS1	S_2	FS1701	diameterBreastHeight	9.6
CoS1	S_2	FS1705	diameterBreastHeight	8.8
CoS1	S_2	FS1714	diameterBreastHeight	11.4
CoS1	S_2	FS1715	diameterBreastHeight	17.2
CoS2	S_2	FS1733	diameterBreastHeight	11.3
CoS2	S_2	FS1739	diameterBreastHeight	10.4
CoS2	S_2	FS1742	diameterBreastHeight	10.1
CoS2	S_2	FS1756	diameterBreastHeight	10.1
CoS2	S_2	FS1763	diameterBreastHeight	10
CoS3	S_2	FS1766	diameterBreastHeight	6.1
CoS3	S_2	FS1768	diameterBreastHeight	12.7
CoS3	S_2	FS1770	diameterBreastHeight	12.7
CoS3	S_2	FS1772	diameterBreastHeight	15
CoS3	S_2	FS1773	diameterBreastHeight	16.2
CoS3	S_2	FS1774	diameterBreastHeight	24.3
CoS3	S_2	FS1775	diameterBreastHeight	12
CoS3	S_2	FS1776	diameterBreastHeight	17.7
CoS3	S_2	FS1777	diameterBreastHeight	27.2
CoS3	S_2	FS1778	diameterBreastHeight	49.6
CoS3	S_2	FS1779	diameterBreastHeight	12.5
CoS3	S_2	FS1780	diameterBreastHeight	14.5
CoS3	S_2	FS1781	diameterBreastHeight	11.4
CoS3	S_2	FS1782	diameterBreastHeight	11.5
CoS3	S_2	FS1783	diameterBreastHeight	7.8
CoS3	S_2	FS1784	diameterBreastHeight	22.7
CoS3	S_2	FS1785	diameterBreastHeight	17.3
CoS3	S_2	FS1786	diameterBreastHeight	23.7
CoS3	S_2	FS1787	diameterBreastHeight	10.9
CoS3	S_2	FS1788	diameterBreastHeight	5.8
CoS3	S_2	FS1789	diameterBreastHeight	10.9
CoS3	S_2	FS1790	diameterBreastHeight	5.8
CoS3	S_2	FS1791	diameterBreastHeight	10
CoS3	S_2	FS1793	diameterBreastHeight	17.2
CoS3	S_2	FS1794	diameterBreastHeight	15.4
CoS3	S_2	FS1795	diameterBreastHeight	7.4
CoS3	S_2	FS1796	diameterBreastHeight	10
CoS3	S_2	FS1797	diameterBreastHeight	10
CoS3	S_2	FS1798	diameterBreastHeight	14.8
CoS3	S_2	FS1800	diameterBreastHeight	15.9
CoS3	S_2	FS1801	diameterBreastHeight	14.9
CoS3	S_2	FS1802	diameterBreastHeight	29
CoS3	S_2	FS1803	diameterBreastHeight	27.6
CoS3	S_2	FS1805	diameterBreastHeight	9.2
CoS3	S_2	FS1808	diameterBreastHeight	30.8
CoS3	S_2	FS1809	diameterBreastHeight	13.2
CoS3	S_2	FS1811	diameterBreastHeight	14.8
CoS3	S_2	FS1816	diameterBreastHeight	11.1
CoS3	S_2	FS1819	diameterBreastHeight	7.8
CoS3	S_2	FS1820	diameterBreastHeight	11.7
CoS3	S_2	FS1824	diameterBreastHeight	6
CoS3	S_2	FS1826	diameterBreastHeight	18.3
CoS3	S_2	FS1827	diameterBreastHeight	8.3
CoS3	S_2	FS1828	diameterBreastHeight	30.9
CoS3	S_2	FS1830	diameterBreastHeight	72.5
CoS3	S_2	FS1832	diameterBreastHeight	47
CoS3	S_2	FS1834	diameterBreastHeight	35.7
CoS4	S_2	FS1836	diameterBreastHeight	10.2
CoS4	S_2	FS1839	diameterBreastHeight	5.8
CoS4	S_2	FS1840	diameterBreastHeight	12.3
CoS4	S_2	FS1841	diameterBreastHeight	9.1
CoS4	S_2	FS1844	diameterBreastHeight	8.1
CoS4	S_2	FS1847	diameterBreastHeight	8.9
CoS4	S_2	FS1853	diameterBreastHeight	5.8
CoS4	S_2	FS1855	diameterBreastHeight	5.7
CoS4	S_2	FS1858	diameterBreastHeight	16.6
CoS4	S_2	FS1859	diameterBreastHeight	24
CoS4	S_2	FS1861	diameterBreastHeight	5.8
CoS4	S_2	FS1862	diameterBreastHeight	30.4
CoS4	S_2	FS1863	diameterBreastHeight	16.5
CoS4	S_2	FS1864	diameterBreastHeight	20.2
CoS4	S_2	FS1865	diameterBreastHeight	14
CoS4	S_2	FS1866	diameterBreastHeight	15.8
CoS4	S_2	FS1871	diameterBreastHeight	11.2
CoS4	S_2	FS1874	diameterBreastHeight	8.4
CoS4	S_2	FS1875	diameterBreastHeight	17.8
CoS4	S_2	FS1876	diameterBreastHeight	5.6
CoS4	S_2	FS1886	diameterBreastHeight	36.2
CoS4	S_2	FS1888	diameterBreastHeight	16.5
CoS4	S_2	FS1903	diameterBreastHeight	28.6
CoS4	S_2	FS1907	diameterBreastHeight	11.4
CoS4	S_2	FS1912	diameterBreastHeight	16.7
CoS4	S_2	FS1914	diameterBreastHeight	12.4
CoS4	S_2	FS1921	diameterBreastHeight	24.3
CoS4	S_2	FS1926	diameterBreastHeight	10.1
CoS4	S_2	FS1930	diameterBreastHeight	9.9
CoS4	S_2	FS1935	diameterBreastHeight	14.4
CoS4	S_2	FS1936	diameterBreastHeight	8
CoS4	S_2	FS1937	diameterBreastHeight	7.3
CoS4	S_2	FS1939	diameterBreastHeight	12.4
CoS4	S_2	FS1943	diameterBreastHeight	19.5
CoS4	S_2	FS1950	diameterBreastHeight	17.3
CoS4	S_2	FS1952	diameterBreastHeight	7.5
CoS4	S_2	FS1961	diameterBreastHeight	13.5
CoS4	S_2	FS1962	diameterBreastHeight	5.6
CoS4	S_2	FS1963	diameterBreastHeight	12.9
PeO5	S_2	FS3662	diameterBreastHeight	49.9
PeD1	S_2	FS3714	diameterBreastHeight	16.5
PeD4	S_2	FS3775	diameterBreastHeight	46.9
PeD4	S_2	FS3776	diameterBreastHeight	31.1
PeD4	S_2	FS3779	diameterBreastHeight	32
PeD4	S_2	FS3780	diameterBreastHeight	9.9
PeD4	S_2	FS3781	diameterBreastHeight	14
PeD4	S_2	FS3782	diameterBreastHeight	11.3
PeD4	S_2	FS3785	diameterBreastHeight	36.2
PeS2	S_2	FS3867	diameterBreastHeight	27.7
PeS3	S_2	FS3888	diameterBreastHeight	26.7
PeS4	S_2	FS3915	diameterBreastHeight	45.5
MaD1	S_3	FS2652	diameterBreastHeight	8.3
MaO2	S_3	FS2750	diameterBreastHeight	5.4
ChS1	S_4	FS731	diameterBreastHeight	18
ChS2	S_4	FS771	diameterBreastHeight	27.5
ChS2	S_4	FS772	diameterBreastHeight	35.1
ChS2	S_4	FS781	diameterBreastHeight	5.7
ChD1	S_4	FS807	diameterBreastHeight	6
ChO1	S_4	FS839	diameterBreastHeight	9.6
ChO2	S_4	FS884	diameterBreastHeight	33.3
ChS3	S_4	FS1102	diameterBreastHeight	19.4
ChS3	S_4	FS1103	diameterBreastHeight	11.7
ChS3	S_4	FS1104	diameterBreastHeight	17.8
ChS5	S_4	FS1174	diameterBreastHeight	36.9
ChD2	S_4	FS1200	diameterBreastHeight	5.5
MaD3	S_5	FS2679	diameterBreastHeight	74.7
MaD3	S_5	FS2680	diameterBreastHeight	10.5
MaD5	S_5	FS2705	diameterBreastHeight	20.5
MaO5	S_5	FS2832	diameterBreastHeight	27.6
MaS1	S_5	FS2840	diameterBreastHeight	46
MaS4	S_5	FS2898	diameterBreastHeight	8.5
ChS2	S_6	FS770	diameterBreastHeight	20.3
ChS2	S_6	FS774	diameterBreastHeight	11
ChS3	S_6	FS1105	diameterBreastHeight	12.2
ChS3	S_6	FS1106	diameterBreastHeight	11.3
ChS3	S_6	FS1107	diameterBreastHeight	11.6
ChS5	S_6	FS1162	diameterBreastHeight	12.5
PaO4	S_6	FS2951	diameterBreastHeight	26
PaD2	S_6	FS3181	diameterBreastHeight	18
PaD2	S_6	FS3184	diameterBreastHeight	18
PaD2	S_6	FS3191	diameterBreastHeight	33.5
PaD2	S_6	FS3193	diameterBreastHeight	17
PaD2	S_6	FS3197	diameterBreastHeight	60
PaD1	S_6	FS3216	diameterBreastHeight	13
PaD1	S_6	FS3233	diameterBreastHeight	18
PaD1	S_6	FS3242	diameterBreastHeight	17.5
PaS5	S_6	FS3323	diameterBreastHeight	6.9
PaS5	S_6	FS3333	diameterBreastHeight	24.5
PaS5	S_6	FS3334	diameterBreastHeight	8.5
PaS5	S_6	FS3335	diameterBreastHeight	9
PaS2	S_6	FS3444	diameterBreastHeight	6.6
PaS1	S_6	FS3474	diameterBreastHeight	28.8
PaS1	S_6	FS3487	diameterBreastHeight	8.6
ZaD2	S_7	FS4226	diameterBreastHeight	9.4
ZaD5	S_7	FS4373	diameterBreastHeight	11.5
ZaS1	S_7	FS4383	diameterBreastHeight	21.8
MaO3	S_8	FS2769	diameterBreastHeight	11.2
CaO1	S_9	FS3	diameterBreastHeight	7
CaD1	S_9	FS204	diameterBreastHeight	8.7
ZaO1	S_9	FS3960	diameterBreastHeight	14
ZaO1	S_9	FS3961	diameterBreastHeight	8.4
ZaO1	S_9	FS3976	diameterBreastHeight	49.3
ZaO2	S_9	FS4012	diameterBreastHeight	15.4
ZaO2	S_9	FS4013	diameterBreastHeight	24
ZaO2	S_9	FS4014	diameterBreastHeight	6.1
ZaO3	S_9	FS4043	diameterBreastHeight	14.8
ZaO3	S_9	FS4048	diameterBreastHeight	8.5
ZaO3	S_9	FS4050	diameterBreastHeight	30.2
ZaO3	S_9	FS4052	diameterBreastHeight	20.1
ZaO3	S_9	FS4056	diameterBreastHeight	19.9
ZaO3	S_9	FS4057	diameterBreastHeight	16.4
ZaO3	S_9	FS4058	diameterBreastHeight	14.2
ZaO3	S_9	FS4060	diameterBreastHeight	30.9
ZaO3	S_9	FS4062	diameterBreastHeight	22.1
ZaO3	S_9	FS4063	diameterBreastHeight	12.7
ZaO3	S_9	FS4064	diameterBreastHeight	16.3
ZaO3	S_9	FS4065	diameterBreastHeight	16.3
ZaO3	S_9	FS4072	diameterBreastHeight	36.4
ZaO3	S_9	FS4073	diameterBreastHeight	8
ZaO3	S_9	FS4076	diameterBreastHeight	5.4
ZaO3	S_9	FS4077	diameterBreastHeight	15
ZaO3	S_9	FS4078	diameterBreastHeight	10.5
ZaO3	S_9	FS4087	diameterBreastHeight	5.6
ZaO3	S_9	FS4091	diameterBreastHeight	58.9
ZaO3	S_9	FS4093	diameterBreastHeight	17.3
ZaO4	S_9	FS4099	diameterBreastHeight	8
ZaO4	S_9	FS4100	diameterBreastHeight	33
ZaO4	S_9	FS4102	diameterBreastHeight	54
ZaO4	S_9	FS4104	diameterBreastHeight	14
ZaO4	S_9	FS4105	diameterBreastHeight	9.5
ZaO4	S_9	FS4106	diameterBreastHeight	29.5
ZaO4	S_9	FS4107	diameterBreastHeight	18
ZaO4	S_9	FS4108	diameterBreastHeight	47
ZaO4	S_9	FS4109	diameterBreastHeight	13
ZaO4	S_9	FS4110	diameterBreastHeight	21
ZaO4	S_9	FS4111	diameterBreastHeight	13
ZaO4	S_9	FS4114	diameterBreastHeight	15.5
ZaO4	S_9	FS4118	diameterBreastHeight	6
ZaO4	S_9	FS4121	diameterBreastHeight	21
ZaO4	S_9	FS4122	diameterBreastHeight	21
ZaO4	S_9	FS4124	diameterBreastHeight	15
ZaO4	S_9	FS4126	diameterBreastHeight	8.5
ZaO5	S_9	FS4140	diameterBreastHeight	16
ZaO5	S_9	FS4141	diameterBreastHeight	12
ZaO5	S_9	FS4149	diameterBreastHeight	20
ZaO5	S_9	FS4153	diameterBreastHeight	7.5
ZaO5	S_9	FS4161	diameterBreastHeight	16.5
ZaO5	S_9	FS4162	diameterBreastHeight	6.5
ZaO5	S_9	FS4165	diameterBreastHeight	6.5
ZaO5	S_9	FS4169	diameterBreastHeight	14
ZaO5	S_9	FS4170	diameterBreastHeight	17.5
ZaO5	S_9	FS4172	diameterBreastHeight	8
ZaO5	S_9	FS4173	diameterBreastHeight	9.5
ZaO5	S_9	FS4174	diameterBreastHeight	33
ZaO5	S_9	FS4178	diameterBreastHeight	7
ZaD1	S_9	FS4184	diameterBreastHeight	26.7
ZaD1	S_9	FS4185	diameterBreastHeight	19.7
ZaD1	S_9	FS4186	diameterBreastHeight	10.4
ZaD1	S_9	FS4187	diameterBreastHeight	5
ZaD1	S_9	FS4198	diameterBreastHeight	57.1
ZaD1	S_9	FS4211	diameterBreastHeight	16.7
ZaD1	S_9	FS4214	diameterBreastHeight	11.5
ZaD1	S_9	FS4215	diameterBreastHeight	10.5
ZaD2	S_9	FS4219	diameterBreastHeight	22
ZaD2	S_9	FS4220	diameterBreastHeight	21.7
ZaD2	S_9	FS4223	diameterBreastHeight	49.2
ZaD2	S_9	FS4227	diameterBreastHeight	26.4
ZaD2	S_9	FS4229	diameterBreastHeight	6.4
ZaD2	S_9	FS4230	diameterBreastHeight	6.1
ZaD2	S_9	FS4246	diameterBreastHeight	12.7
ZaD2	S_9	FS4247	diameterBreastHeight	26.4
ZaD2	S_9	FS4256	diameterBreastHeight	30.9
ZaD3	S_9	FS4264	diameterBreastHeight	7
ZaD3	S_9	FS4268	diameterBreastHeight	12.6
ZaD3	S_9	FS4269	diameterBreastHeight	10.6
ZaD3	S_9	FS4271	diameterBreastHeight	6.5
ZaD3	S_9	FS4296	diameterBreastHeight	18.9
ZaD4	S_9	FS4311	diameterBreastHeight	16.7
ZaD4	S_9	FS4315	diameterBreastHeight	6.8
ZaD4	S_9	FS4316	diameterBreastHeight	8
ZaD4	S_9	FS4322	diameterBreastHeight	31.1
ZaD4	S_9	FS4323	diameterBreastHeight	10.7
ZaD4	S_9	FS4328	diameterBreastHeight	10.4
ZaD4	S_9	FS4330	diameterBreastHeight	10.4
ZaD4	S_9	FS4331	diameterBreastHeight	10.9
ZaD4	S_9	FS4340	diameterBreastHeight	13.2
ZaD4	S_9	FS4345	diameterBreastHeight	13.9
ZaD5	S_9	FS4353	diameterBreastHeight	12
ZaD5	S_9	FS4355	diameterBreastHeight	14
ZaS1	S_9	FS4382	diameterBreastHeight	24.5
ZaS2	S_9	FS4418	diameterBreastHeight	21.7
ZaS2	S_9	FS4419	diameterBreastHeight	11.6
ZaS4	S_9	FS4518	diameterBreastHeight	10
ZaS4	S_9	FS4546	diameterBreastHeight	6
ZaO3	S_10	FS4055	diameterBreastHeight	54.3
ZaD5	S_10	FS4368	diameterBreastHeight	7
ZaD5	S_10	FS4372	diameterBreastHeight	38.5
ZaS2	S_10	FS4459	diameterBreastHeight	28.2
ZaS3	S_10	FS4477	diameterBreastHeight	21.1
ZaS3	S_10	FS4478	diameterBreastHeight	27
ZaS3	S_10	FS4494	diameterBreastHeight	18
ZaS3	S_10	FS4495	diameterBreastHeight	22.7
ZaS3	S_10	FS4496	diameterBreastHeight	7.2
ZaS3	S_10	FS4497	diameterBreastHeight	20.4
ZaS3	S_10	FS4504	diameterBreastHeight	23.5
ZaS3	S_10	FS4505	diameterBreastHeight	8.5
ZaS3	S_10	FS4507	diameterBreastHeight	25.4
ZaS3	S_10	FS4509	diameterBreastHeight	6.7
ZaS3	S_10	FS4512	diameterBreastHeight	23.5
ZaS3	S_10	FS4513	diameterBreastHeight	18
ZaS3	S_10	FS4515	diameterBreastHeight	24.8
ZaS4	S_10	FS4533	diameterBreastHeight	10.5
ZaS4	S_10	FS4536	diameterBreastHeight	10.5
ZaS4	S_10	FS4537	diameterBreastHeight	11.6
ZaS4	S_10	FS4540	diameterBreastHeight	12
ZaS4	S_10	FS4542	diameterBreastHeight	28.7
ZaS4	S_10	FS4543	diameterBreastHeight	26.3
ZaS4	S_10	FS4544	diameterBreastHeight	30.8
ZaS4	S_10	FS4547	diameterBreastHeight	14.7
ZaS4	S_10	FS4548	diameterBreastHeight	25.2
ZaS4	S_10	FS4552	diameterBreastHeight	8.9
ZaS4	S_10	FS4553	diameterBreastHeight	66
ZaS4	S_10	FS4557	diameterBreastHeight	21.3
ZaS4	S_10	FS4558	diameterBreastHeight	6.5
ZaS4	S_10	FS4559	diameterBreastHeight	26.4
ZaS4	S_10	FS4560	diameterBreastHeight	29.5
ZaS4	S_10	FS4561	diameterBreastHeight	21.7
ZaS5	S_10	FS4562	diameterBreastHeight	10
ZaS5	S_10	FS4569	diameterBreastHeight	32.5
ZaS5	S_10	FS4570	diameterBreastHeight	27
ZaS5	S_10	FS4571	diameterBreastHeight	7.5
ZaS5	S_10	FS4576	diameterBreastHeight	20
ZaS5	S_10	FS4580	diameterBreastHeight	32
ZaS5	S_10	FS4582	diameterBreastHeight	33
ZaS5	S_10	FS4583	diameterBreastHeight	33
ZaS5	S_10	FS4587	diameterBreastHeight	38.5
PeO2	S_11	FS3540	diameterBreastHeight	6.8
PeO2	S_11	FS3541	diameterBreastHeight	7.8
PeO2	S_11	FS3548	diameterBreastHeight	9.8
PeO2	S_11	FS3553	diameterBreastHeight	13.3
PeO2	S_11	FS3554	diameterBreastHeight	15.2
PeO2	S_11	FS3557	diameterBreastHeight	31.3
PeO5	S_11	FS3658	diameterBreastHeight	60.5
PeO5	S_11	FS3660	diameterBreastHeight	11
PeO5	S_11	FS3661	diameterBreastHeight	18.9
PeO5	S_11	FS3678	diameterBreastHeight	23
PeO5	S_11	FS3686	diameterBreastHeight	31
PeD1	S_11	FS3706	diameterBreastHeight	16.9
PeD1	S_11	FS3716	diameterBreastHeight	18.7
PeD2	S_11	FS3717	diameterBreastHeight	16
PeD2	S_11	FS3718	diameterBreastHeight	40
PeD2	S_11	FS3719	diameterBreastHeight	19
PeD2	S_11	FS3720	diameterBreastHeight	9.5
PeD2	S_11	FS3721	diameterBreastHeight	18
PeD2	S_11	FS3722	diameterBreastHeight	30
PeD2	S_11	FS3724	diameterBreastHeight	31
PeD2	S_11	FS3725	diameterBreastHeight	12
PeD2	S_11	FS3726	diameterBreastHeight	7.5
PeD2	S_11	FS3727	diameterBreastHeight	21
PeD2	S_11	FS3729	diameterBreastHeight	49
PeD2	S_11	FS3730	diameterBreastHeight	23
PeD2	S_11	FS3732	diameterBreastHeight	28
PeD2	S_11	FS3733	diameterBreastHeight	39
PeD2	S_11	FS3734	diameterBreastHeight	22
PeD2	S_11	FS3735	diameterBreastHeight	30
PeD2	S_11	FS3736	diameterBreastHeight	35
PeD2	S_11	FS3737	diameterBreastHeight	25.5
PeD2	S_11	FS3738	diameterBreastHeight	22
PeD2	S_11	FS3740	diameterBreastHeight	29
PeD2	S_11	FS3741	diameterBreastHeight	20.5
PeD2	S_11	FS3743	diameterBreastHeight	25
PeD2	S_11	FS3744	diameterBreastHeight	30.5
PeD2	S_11	FS3745	diameterBreastHeight	25.7
PeD2	S_11	FS3746	diameterBreastHeight	23.3
PeD2	S_11	FS3747	diameterBreastHeight	29.5
PeD2	S_11	FS3748	diameterBreastHeight	54.5
PeD3	S_11	FS3749	diameterBreastHeight	30.5
PeD3	S_11	FS3750	diameterBreastHeight	56.5
PeD3	S_11	FS3751	diameterBreastHeight	41.7
PeD3	S_11	FS3752	diameterBreastHeight	36.5
PeD3	S_11	FS3753	diameterBreastHeight	30
PeD3	S_11	FS3754	diameterBreastHeight	14.3
PeD3	S_11	FS3755	diameterBreastHeight	23
PeD3	S_11	FS3756	diameterBreastHeight	27.5
PeD3	S_11	FS3757	diameterBreastHeight	45
PeD3	S_11	FS3758	diameterBreastHeight	27.8
PeD3	S_11	FS3759	diameterBreastHeight	28.5
PeD3	S_11	FS3760	diameterBreastHeight	10.5
PeD3	S_11	FS3761	diameterBreastHeight	42
PeD3	S_11	FS3762	diameterBreastHeight	30
PeD3	S_11	FS3763	diameterBreastHeight	20.5
PeD3	S_11	FS3764	diameterBreastHeight	68.5
PeD3	S_11	FS3765	diameterBreastHeight	89.9
PeD3	S_11	FS3767	diameterBreastHeight	56.4
PeD3	S_11	FS3768	diameterBreastHeight	31.8
PeD3	S_11	FS3769	diameterBreastHeight	33.5
PeD3	S_11	FS3770	diameterBreastHeight	48
PeD3	S_11	FS3771	diameterBreastHeight	17
PeD3	S_11	FS3772	diameterBreastHeight	21.8
PeD3	S_11	FS3773	diameterBreastHeight	33
PeD3	S_11	FS3774	diameterBreastHeight	39
PeD4	S_11	FS3784	diameterBreastHeight	11.7
PeD5	S_11	FS3786	diameterBreastHeight	18.4
PeD5	S_11	FS3807	diameterBreastHeight	48
PeS2	S_11	FS3846	diameterBreastHeight	7.4
PeS2	S_11	FS3848	diameterBreastHeight	21.8
PeS2	S_11	FS3850	diameterBreastHeight	9.7
PeS2	S_11	FS3851	diameterBreastHeight	20.5
PeS2	S_11	FS3858	diameterBreastHeight	11.4
PeS2	S_11	FS3859	diameterBreastHeight	23.1
PeS2	S_11	FS3861	diameterBreastHeight	79.7
PeS2	S_11	FS3871	diameterBreastHeight	14.5
PeS2	S_11	FS3873	diameterBreastHeight	5.7
PeS2	S_11	FS3874	diameterBreastHeight	5.7
PeS3	S_11	FS3877	diameterBreastHeight	59.2
PeS3	S_11	FS3878	diameterBreastHeight	10.6
PeS3	S_11	FS3879	diameterBreastHeight	11.4
PeS3	S_11	FS3880	diameterBreastHeight	33.9
PeS3	S_11	FS3881	diameterBreastHeight	22.2
PeS3	S_11	FS3882	diameterBreastHeight	44.5
PeS3	S_11	FS3883	diameterBreastHeight	19.1
PeS3	S_11	FS3885	diameterBreastHeight	23.3
PeS3	S_11	FS3887	diameterBreastHeight	56.4
PeS3	S_11	FS3889	diameterBreastHeight	50.6
PeS3	S_11	FS3890	diameterBreastHeight	56.4
PeS3	S_11	FS3891	diameterBreastHeight	22.5
PeS3	S_11	FS3893	diameterBreastHeight	10.6
PeS3	S_11	FS3894	diameterBreastHeight	9
PeS3	S_11	FS3895	diameterBreastHeight	59.3
PeS3	S_11	FS3896	diameterBreastHeight	18.7
PeS3	S_11	FS3897	diameterBreastHeight	46.8
PeS4	S_11	FS3900	diameterBreastHeight	47.5
PeS4	S_11	FS3901	diameterBreastHeight	43
PeS4	S_11	FS3902	diameterBreastHeight	66
PeS4	S_11	FS3913	diameterBreastHeight	21
PeS4	S_11	FS3914	diameterBreastHeight	49
PeS5	S_11	FS3916	diameterBreastHeight	46.5
PeS5	S_11	FS3919	diameterBreastHeight	39
PeS5	S_11	FS3920	diameterBreastHeight	25.3
PeS5	S_11	FS3927	diameterBreastHeight	75.8
PeS5	S_11	FS3930	diameterBreastHeight	33.2
PeS5	S_11	FS3935	diameterBreastHeight	21.5
MaD3	S_12	FS2676	diameterBreastHeight	24.2
PaO2	S_13	FS3023	diameterBreastHeight	22
PaD5	S_13	FS3276	diameterBreastHeight	6
CaS3	S_14	FS560	diameterBreastHeight	7.7
PeO2	S_15	FS3535	diameterBreastHeight	10.2
PeO2	S_15	FS3559	diameterBreastHeight	13.9
PeO4	S_15	FS3629	diameterBreastHeight	52.7
PeS1	S_15	FS3815	diameterBreastHeight	17.5
PeS1	S_15	FS3816	diameterBreastHeight	23.1
PeS1	S_15	FS3817	diameterBreastHeight	12.2
PeS1	S_15	FS3818	diameterBreastHeight	31.4
PeS1	S_15	FS3829	diameterBreastHeight	47.1
CaO4	S_16	FS111	diameterBreastHeight	8.7
CaO5	S_16	FS146	diameterBreastHeight	32.5
ZaD2	S_17	FS4221	diameterBreastHeight	15.1
ZaD2	S_17	FS4249	diameterBreastHeight	5.3
ZaD5	S_17	FS4380	diameterBreastHeight	14
ZaD5	S_17	FS4381	diameterBreastHeight	7.5
ZaS3	S_17	FS4471	diameterBreastHeight	6.5
ZaS3	S_17	FS4480	diameterBreastHeight	14
ZaS4	S_17	FS4526	diameterBreastHeight	7.3
ZaS5	S_17	FS4596	diameterBreastHeight	14
ZaS5	S_17	FS4597	diameterBreastHeight	7.5
ChS3	S_19	FS1092	diameterBreastHeight	8.2
ChS3	S_19	FS1093	diameterBreastHeight	5.3
ChS3	S_19	FS1094	diameterBreastHeight	12.4
ChS3	S_19	FS1109	diameterBreastHeight	14.8
ChD4	S_20	FS853	diameterBreastHeight	7
MaO1	S_20	FS2721	diameterBreastHeight	11.1
MaO1	S_20	FS2722	diameterBreastHeight	9.6
MaO1	S_20	FS2723	diameterBreastHeight	29.2
MaO1	S_20	FS2724	diameterBreastHeight	6.4
MaO1	S_20	FS2725	diameterBreastHeight	9.5
MaO1	S_20	FS2726	diameterBreastHeight	12.7
MaO1	S_20	FS2727	diameterBreastHeight	13
MaO1	S_20	FS2728	diameterBreastHeight	60.2
MaO1	S_20	FS2729	diameterBreastHeight	38
MaO5	S_20	FS2822	diameterBreastHeight	33
PaO5	S_20	FS2914	diameterBreastHeight	24
PaO5	S_20	FS2915	diameterBreastHeight	12
PaO5	S_20	FS2916	diameterBreastHeight	6
PaO5	S_20	FS2917	diameterBreastHeight	7
PaO5	S_20	FS2919	diameterBreastHeight	13.5
PaO5	S_20	FS2923	diameterBreastHeight	37
PaO5	S_20	FS2924	diameterBreastHeight	33
PaO5	S_20	FS2926	diameterBreastHeight	25
PaO5	S_20	FS2927	diameterBreastHeight	46
PaO5	S_20	FS2933	diameterBreastHeight	6
PaO5	S_20	FS2935	diameterBreastHeight	17
PaO5	S_20	FS2936	diameterBreastHeight	78
PaO5	S_20	FS2938	diameterBreastHeight	49
PaO5	S_20	FS2943	diameterBreastHeight	54.5
PaO5	S_20	FS2944	diameterBreastHeight	6.5
PaO5	S_20	FS2945	diameterBreastHeight	20
PaO5	S_20	FS2946	diameterBreastHeight	6.5
PaO5	S_20	FS2947	diameterBreastHeight	5
PaO4	S_20	FS2950	diameterBreastHeight	6
PaO4	S_20	FS2970	diameterBreastHeight	10
PaO4	S_20	FS2972	diameterBreastHeight	19
PaO4	S_20	FS2973	diameterBreastHeight	7
PaO4	S_20	FS2974	diameterBreastHeight	16
PaO4	S_20	FS2975	diameterBreastHeight	57
PaO4	S_20	FS2980	diameterBreastHeight	6
PaO3	S_20	FS2995	diameterBreastHeight	36.3
PaO3	S_20	FS3001	diameterBreastHeight	16.9
PaO3	S_20	FS3007	diameterBreastHeight	5
PaO3	S_20	FS3008	diameterBreastHeight	16.4
PaO3	S_20	FS3014	diameterBreastHeight	25.2
PaO3	S_20	FS3015	diameterBreastHeight	19.5
PaO3	S_20	FS3016	diameterBreastHeight	18.1
PaO3	S_20	FS3017	diameterBreastHeight	8.8
PaO3	S_20	FS3019	diameterBreastHeight	12.9
PaO3	S_20	FS3020	diameterBreastHeight	42.2
PaO3	S_20	FS3021	diameterBreastHeight	51.6
PaO2	S_20	FS3035	diameterBreastHeight	13
PaO2	S_20	FS3036	diameterBreastHeight	41.5
PaO2	S_20	FS3047	diameterBreastHeight	5
PaO2	S_20	FS3051	diameterBreastHeight	8
PaO1	S_20	FS3053	diameterBreastHeight	7.4
PaD5	S_20	FS3247	diameterBreastHeight	12
PaD5	S_20	FS3251	diameterBreastHeight	25
PaD5	S_20	FS3252	diameterBreastHeight	31
PaD5	S_20	FS3253	diameterBreastHeight	25
PaD5	S_20	FS3254	diameterBreastHeight	28
PaD5	S_20	FS3258	diameterBreastHeight	19.5
PaD5	S_20	FS3262	diameterBreastHeight	9.5
PaD5	S_20	FS3266	diameterBreastHeight	15
PaD5	S_20	FS3271	diameterBreastHeight	5.5
PaD5	S_20	FS3277	diameterBreastHeight	5
PaD5	S_20	FS3278	diameterBreastHeight	32
PaS5	S_20	FS3327	diameterBreastHeight	14.9
ZaS1	S_21	FS4403	diameterBreastHeight	12.3
ZaS4	S_21	FS4550	diameterBreastHeight	6.8
ChS1	S_22	FS720	diameterBreastHeight	11
ChS1	S_22	FS727	diameterBreastHeight	11
ChS1	S_22	FS729	diameterBreastHeight	15.5
ChS1	S_22	FS734	diameterBreastHeight	6
ChS1	S_22	FS735	diameterBreastHeight	8
ChS1	S_22	FS736	diameterBreastHeight	7
ChS1	S_22	FS737	diameterBreastHeight	8
ChS1	S_22	FS738	diameterBreastHeight	5.6
ChS1	S_22	FS739	diameterBreastHeight	6
ChS1	S_22	FS740	diameterBreastHeight	6
ChS1	S_22	FS741	diameterBreastHeight	6
ChS1	S_22	FS742	diameterBreastHeight	7
ChS2	S_22	FS756	diameterBreastHeight	13
ChS2	S_22	FS757	diameterBreastHeight	5.3
ChS2	S_22	FS760	diameterBreastHeight	5.4
ChS2	S_22	FS767	diameterBreastHeight	26.9
ChS2	S_22	FS768	diameterBreastHeight	18.7
ChS2	S_22	FS778	diameterBreastHeight	63.6
ChD1	S_22	FS799	diameterBreastHeight	14
ChO1	S_22	FS816	diameterBreastHeight	7.5
ChO1	S_22	FS817	diameterBreastHeight	5.1
ChO1	S_22	FS834	diameterBreastHeight	22.7
ChD4	S_22	FS863	diameterBreastHeight	13.5
ChD4	S_22	FS867	diameterBreastHeight	16.5
ChD4	S_22	FS868	diameterBreastHeight	16
ChD4	S_22	FS869	diameterBreastHeight	29.5
ChO2	S_22	FS887	diameterBreastHeight	19
ChO3	S_22	FS931	diameterBreastHeight	33
ChO3	S_22	FS932	diameterBreastHeight	20
ChO5	S_22	FS1027	diameterBreastHeight	15
ChS3	S_22	FS1076	diameterBreastHeight	9.3
ChS3	S_22	FS1077	diameterBreastHeight	8.3
ChS3	S_22	FS1095	diameterBreastHeight	10
ChS3	S_22	FS1096	diameterBreastHeight	40.6
ChS3	S_22	FS1097	diameterBreastHeight	11.2
ChS3	S_22	FS1098	diameterBreastHeight	22
ChS4	S_22	FS1117	diameterBreastHeight	6.5
ChS4	S_22	FS1118	diameterBreastHeight	9
ChS4	S_22	FS1119	diameterBreastHeight	6
ChS4	S_22	FS1128	diameterBreastHeight	17.8
ChS4	S_22	FS1129	diameterBreastHeight	10.7
ChS4	S_22	FS1130	diameterBreastHeight	11.1
ChS4	S_22	FS1131	diameterBreastHeight	17.8
ChS4	S_22	FS1132	diameterBreastHeight	26.2
ChS5	S_22	FS1153	diameterBreastHeight	7.9
ChS5	S_22	FS1154	diameterBreastHeight	5.5
ChS5	S_22	FS1155	diameterBreastHeight	7.5
ChS5	S_22	FS1156	diameterBreastHeight	9.9
ChS5	S_22	FS1163	diameterBreastHeight	15.9
ChS5	S_22	FS1164	diameterBreastHeight	15.6
ChD5	S_22	FS1184	diameterBreastHeight	8.5
ChD3	S_22	FS1219	diameterBreastHeight	20
MaD1	S_22	FS2653	diameterBreastHeight	27.4
MaD2	S_22	FS2661	diameterBreastHeight	15.1
MaD2	S_22	FS2662	diameterBreastHeight	16.6
MaD2	S_22	FS2663	diameterBreastHeight	11.3
MaD2	S_22	FS2664	diameterBreastHeight	25.3
MaD2	S_22	FS2665	diameterBreastHeight	18.6
MaD2	S_22	FS2666	diameterBreastHeight	8.6
MaD2	S_22	FS2667	diameterBreastHeight	25.8
MaD2	S_22	FS2668	diameterBreastHeight	13.2
MaD2	S_22	FS2669	diameterBreastHeight	16.5
MaD2	S_22	FS2670	diameterBreastHeight	8.6
MaD2	S_22	FS2671	diameterBreastHeight	22.6
MaD2	S_22	FS2672	diameterBreastHeight	24.6
MaD2	S_22	FS2673	diameterBreastHeight	7.6
MaD3	S_22	FS2677	diameterBreastHeight	7.5
MaD4	S_22	FS2687	diameterBreastHeight	43.9
MaD5	S_22	FS2698	diameterBreastHeight	22.8
MaD5	S_22	FS2699	diameterBreastHeight	22.8
MaD5	S_22	FS2700	diameterBreastHeight	20.7
MaD5	S_22	FS2701	diameterBreastHeight	18.9
MaD5	S_22	FS2702	diameterBreastHeight	15.5
MaD5	S_22	FS2703	diameterBreastHeight	18.3
MaO4	S_22	FS2796	diameterBreastHeight	100
MaO4	S_22	FS2800	diameterBreastHeight	28.4
MaO4	S_22	FS2802	diameterBreastHeight	49
MaO5	S_22	FS2808	diameterBreastHeight	9.6
PaO4	S_22	FS2957	diameterBreastHeight	26
PaO4	S_22	FS2962	diameterBreastHeight	24.5
PaO4	S_22	FS2964	diameterBreastHeight	40
PaO4	S_22	FS2978	diameterBreastHeight	9.5
PaO4	S_22	FS2984	diameterBreastHeight	9
PaO4	S_22	FS2992	diameterBreastHeight	58.6
PaO3	S_22	FS2999	diameterBreastHeight	12.8
PaO3	S_22	FS3000	diameterBreastHeight	6.5
PaO2	S_22	FS3026	diameterBreastHeight	11
PaO2	S_22	FS3049	diameterBreastHeight	10
PaO1	S_22	FS3052	diameterBreastHeight	46.2
PaO1	S_22	FS3061	diameterBreastHeight	28.3
PaO1	S_22	FS3063	diameterBreastHeight	13.6
PaD3	S_22	FS3064	diameterBreastHeight	6.2
PaD3	S_22	FS3065	diameterBreastHeight	10.3
PaD3	S_22	FS3071	diameterBreastHeight	13.8
PaD3	S_22	FS3111	diameterBreastHeight	9
PaD2	S_22	FS3175	diameterBreastHeight	8.6
PaD2	S_22	FS3206	diameterBreastHeight	15
PaD1	S_22	FS3232	diameterBreastHeight	10.7
PaD1	S_22	FS3239	diameterBreastHeight	15.5
PaD5	S_22	FS3260	diameterBreastHeight	13
PaD5	S_22	FS3261	diameterBreastHeight	32
PaD5	S_22	FS3263	diameterBreastHeight	46.5
PaD4	S_22	FS3297	diameterBreastHeight	19.2
PaD4	S_22	FS3298	diameterBreastHeight	18.3
PaD4	S_22	FS3303	diameterBreastHeight	15.1
PaD4	S_22	FS3304	diameterBreastHeight	36.3
PaD4	S_22	FS3309	diameterBreastHeight	13.7
PaD4	S_22	FS3312	diameterBreastHeight	10
PaD4	S_22	FS3313	diameterBreastHeight	9.1
PaD4	S_22	FS3315	diameterBreastHeight	12.5
PaS5	S_22	FS3340	diameterBreastHeight	18.1
PaS5	S_22	FS3343	diameterBreastHeight	12.9
PaS5	S_22	FS3346	diameterBreastHeight	22.1
PaS4	S_22	FS3363	diameterBreastHeight	14.8
PaS3	S_22	FS3394	diameterBreastHeight	6.4
PaS3	S_22	FS3395	diameterBreastHeight	8.5
PaS3	S_22	FS3397	diameterBreastHeight	10.4
PaS3	S_22	FS3404	diameterBreastHeight	7.3
PaS3	S_22	FS3405	diameterBreastHeight	9.8
PaS3	S_22	FS3408	diameterBreastHeight	10.2
PaS3	S_22	FS3409	diameterBreastHeight	9.5
PaS3	S_22	FS3411	diameterBreastHeight	10.1
PaS3	S_22	FS3412	diameterBreastHeight	10.6
PaS3	S_22	FS3413	diameterBreastHeight	10.3
PaS3	S_22	FS3416	diameterBreastHeight	9.8
PaS3	S_22	FS3418	diameterBreastHeight	17.1
PaS3	S_22	FS3419	diameterBreastHeight	8.7
PaS2	S_22	FS3432	diameterBreastHeight	5.9
PaS2	S_22	FS3440	diameterBreastHeight	5.2
PaS2	S_22	FS3443	diameterBreastHeight	5.4
PaS1	S_22	FS3453	diameterBreastHeight	18.1
PaS1	S_22	FS3459	diameterBreastHeight	6.5
PaS1	S_22	FS3461	diameterBreastHeight	7.7
PaS1	S_22	FS3462	diameterBreastHeight	8.4
PaS1	S_22	FS3463	diameterBreastHeight	5.6
PaS1	S_22	FS3464	diameterBreastHeight	5.2
PaS1	S_22	FS3468	diameterBreastHeight	6.6
PaS1	S_22	FS3471	diameterBreastHeight	10
PaS1	S_22	FS3473	diameterBreastHeight	6.3
PaS1	S_22	FS3476	diameterBreastHeight	8.8
PaS1	S_22	FS3477	diameterBreastHeight	8
PaS1	S_22	FS3478	diameterBreastHeight	7.6
PaS1	S_22	FS3479	diameterBreastHeight	7.8
PaS1	S_22	FS3482	diameterBreastHeight	7
PaS1	S_22	FS3483	diameterBreastHeight	6.5
PaS1	S_22	FS3484	diameterBreastHeight	5.3
PaS1	S_22	FS3485	diameterBreastHeight	5.5
PaS1	S_22	FS3486	diameterBreastHeight	5.5
PaS1	S_22	FS3489	diameterBreastHeight	11.3
PaS1	S_22	FS3492	diameterBreastHeight	5.8
PaS1	S_22	FS3493	diameterBreastHeight	6.2
PaS1	S_22	FS3495	diameterBreastHeight	5.5
PaS1	S_22	FS3496	diameterBreastHeight	6.9
PaO3	S_23	FS2994	diameterBreastHeight	9.7
PaS2	S_23	FS3424	diameterBreastHeight	9.2
PaS2	S_23	FS3429	diameterBreastHeight	13.5
PaS2	S_23	FS3430	diameterBreastHeight	19.4
MaD4	S_24	FS2688	diameterBreastHeight	5.6
MaD4	S_24	FS2689	diameterBreastHeight	35.2
MaD4	S_24	FS2690	diameterBreastHeight	34.2
MaD4	S_24	FS2691	diameterBreastHeight	89.3
MaD5	S_24	FS2712	diameterBreastHeight	28.1
MaO3	S_24	FS2785	diameterBreastHeight	31
ChO3	S_25	FS933	diameterBreastHeight	8.5
CaS4	S_26	FS587	diameterBreastHeight	5.5
CaS4	S_26	FS593	diameterBreastHeight	9.1
CaO1	S_26	FS6	diameterBreastHeight	11.7
CaO1	S_26	FS7	diameterBreastHeight	26.5
CaO1	S_26	FS16	diameterBreastHeight	35.9
CaO1	S_26	FS17	diameterBreastHeight	20.4
CaO2	S_26	FS66	diameterBreastHeight	27.4
CaO2	S_26	FS69	diameterBreastHeight	9.9
CaO3	S_26	FS76	diameterBreastHeight	22
CaO3	S_26	FS81	diameterBreastHeight	31.5
CaO3	S_26	FS96	diameterBreastHeight	61
CaO4	S_26	FS112	diameterBreastHeight	26.6
CaO5	S_26	FS159	diameterBreastHeight	14
CaD1	S_26	FS185	diameterBreastHeight	8.5
CaD1	S_26	FS190	diameterBreastHeight	33.9
CaD1	S_26	FS191	diameterBreastHeight	5.3
CaD1	S_26	FS192	diameterBreastHeight	28.6
CaD1	S_26	FS194	diameterBreastHeight	6
CaD1	S_26	FS196	diameterBreastHeight	6.7
CaD1	S_26	FS197	diameterBreastHeight	23
CaD1	S_26	FS198	diameterBreastHeight	11.7
CaD1	S_26	FS199	diameterBreastHeight	9.8
CaD1	S_26	FS200	diameterBreastHeight	6.9
CaD1	S_26	FS201	diameterBreastHeight	6.1
CaD1	S_26	FS209	diameterBreastHeight	11.3
CaD1	S_26	FS210	diameterBreastHeight	6.9
CaD1	S_26	FS211	diameterBreastHeight	8
CaD1	S_26	FS212	diameterBreastHeight	6.2
CaD1	S_26	FS213	diameterBreastHeight	16.2
CaD1	S_26	FS214	diameterBreastHeight	9
CaD1	S_26	FS215	diameterBreastHeight	20.3
CaD1	S_26	FS216	diameterBreastHeight	7.2
CaD1	S_26	FS219	diameterBreastHeight	14.3
CaD1	S_26	FS220	diameterBreastHeight	9
CaD1	S_26	FS222	diameterBreastHeight	15.9
CaD1	S_26	FS228	diameterBreastHeight	13.7
CaD2	S_26	FS245	diameterBreastHeight	18.4
CaD2	S_26	FS247	diameterBreastHeight	19.1
CaD2	S_26	FS248	diameterBreastHeight	8.6
CaD2	S_26	FS249	diameterBreastHeight	18.2
CaD2	S_26	FS251	diameterBreastHeight	5.9
CaD2	S_26	FS252	diameterBreastHeight	7.8
CaD2	S_26	FS253	diameterBreastHeight	5.9
CaD2	S_26	FS254	diameterBreastHeight	7.8
CaD2	S_26	FS255	diameterBreastHeight	6.2
CaD2	S_26	FS257	diameterBreastHeight	17.4
CaD2	S_26	FS259	diameterBreastHeight	13.3
CaD2	S_26	FS260	diameterBreastHeight	8.2
CaD2	S_26	FS261	diameterBreastHeight	28.9
CaD2	S_26	FS262	diameterBreastHeight	7.7
CaD2	S_26	FS263	diameterBreastHeight	17.7
CaD2	S_26	FS266	diameterBreastHeight	6.6
CaD2	S_26	FS267	diameterBreastHeight	15.7
CaD2	S_26	FS268	diameterBreastHeight	6.5
CaD2	S_26	FS269	diameterBreastHeight	7.7
CaD2	S_26	FS271	diameterBreastHeight	6
CaD2	S_26	FS273	diameterBreastHeight	35.3
CaD2	S_26	FS274	diameterBreastHeight	22.1
CaD2	S_26	FS275	diameterBreastHeight	14.7
CaD2	S_26	FS276	diameterBreastHeight	11.6
CaD2	S_26	FS277	diameterBreastHeight	9.9
CaD2	S_26	FS280	diameterBreastHeight	21.5
CaD3	S_26	FS288	diameterBreastHeight	16.8
CaD3	S_26	FS294	diameterBreastHeight	7
CaD3	S_26	FS295	diameterBreastHeight	9.5
CaD3	S_26	FS298	diameterBreastHeight	6.8
CaD3	S_26	FS299	diameterBreastHeight	5.5
CaD3	S_26	FS303	diameterBreastHeight	8.5
CaD3	S_26	FS304	diameterBreastHeight	17.2
CaD3	S_26	FS306	diameterBreastHeight	13.6
CaD3	S_26	FS309	diameterBreastHeight	11
CaD3	S_26	FS311	diameterBreastHeight	11.2
CaD3	S_26	FS314	diameterBreastHeight	10.7
CaD3	S_26	FS315	diameterBreastHeight	7.8
CaD3	S_26	FS317	diameterBreastHeight	12.5
CaD3	S_26	FS318	diameterBreastHeight	11.8
CaD3	S_26	FS320	diameterBreastHeight	5.7
CaD3	S_26	FS321	diameterBreastHeight	10.5
CaD3	S_26	FS323	diameterBreastHeight	8.8
CaD3	S_26	FS326	diameterBreastHeight	9
CaD3	S_26	FS327	diameterBreastHeight	8.6
CaD3	S_26	FS329	diameterBreastHeight	11.4
CaD3	S_26	FS331	diameterBreastHeight	13.4
CaD3	S_26	FS333	diameterBreastHeight	11.1
CaD3	S_26	FS335	diameterBreastHeight	9.4
CaD3	S_26	FS336	diameterBreastHeight	15
CaD3	S_26	FS338	diameterBreastHeight	6.1
CaD4	S_26	FS339	diameterBreastHeight	6
CaD4	S_26	FS344	diameterBreastHeight	11
CaD4	S_26	FS345	diameterBreastHeight	13
CaD4	S_26	FS346	diameterBreastHeight	22.2
CaD4	S_26	FS347	diameterBreastHeight	11.1
CaD4	S_26	FS348	diameterBreastHeight	5.6
CaD4	S_26	FS349	diameterBreastHeight	9.5
CaD4	S_26	FS350	diameterBreastHeight	5.4
CaD4	S_26	FS351	diameterBreastHeight	7
CaD4	S_26	FS359	diameterBreastHeight	6.2
CaD4	S_26	FS368	diameterBreastHeight	10.2
CaD4	S_26	FS369	diameterBreastHeight	9.3
CaD4	S_26	FS375	diameterBreastHeight	5.9
CaD4	S_26	FS377	diameterBreastHeight	7.8
CaD4	S_26	FS378	diameterBreastHeight	7.3
CaD4	S_26	FS379	diameterBreastHeight	7.1
CaD4	S_26	FS380	diameterBreastHeight	7.7
CaD4	S_26	FS381	diameterBreastHeight	6.4
CaD4	S_26	FS382	diameterBreastHeight	13
CaD4	S_26	FS383	diameterBreastHeight	5.9
CaD4	S_26	FS385	diameterBreastHeight	10.9
CaD4	S_26	FS386	diameterBreastHeight	12.7
CaD4	S_26	FS387	diameterBreastHeight	10.8
CaD4	S_26	FS391	diameterBreastHeight	22.4
CaD5	S_26	FS395	diameterBreastHeight	32.3
CaD5	S_26	FS398	diameterBreastHeight	28.9
CaD5	S_26	FS405	diameterBreastHeight	21.9
CaD5	S_26	FS406	diameterBreastHeight	26.2
ZaO1	S_26	FS3938	diameterBreastHeight	26.1
ZaO1	S_26	FS3939	diameterBreastHeight	63.3
ZaO1	S_26	FS3971	diameterBreastHeight	37.7
ZaO1	S_26	FS3972	diameterBreastHeight	8.9
ZaO1	S_26	FS3973	diameterBreastHeight	5.3
ZaO1	S_26	FS3974	diameterBreastHeight	20
ZaO1	S_26	FS3975	diameterBreastHeight	6.1
ZaO1	S_26	FS3977	diameterBreastHeight	11.1
ZaO1	S_26	FS3978	diameterBreastHeight	13.4
ZaO1	S_26	FS3980	diameterBreastHeight	20.1
ZaO1	S_26	FS3982	diameterBreastHeight	18.4
ZaO1	S_26	FS3985	diameterBreastHeight	7.6
ZaO1	S_26	FS3986	diameterBreastHeight	7
ZaO1	S_26	FS3987	diameterBreastHeight	13.1
ZaO1	S_26	FS3988	diameterBreastHeight	5.6
ZaO1	S_26	FS3989	diameterBreastHeight	10.2
ZaO1	S_26	FS3990	diameterBreastHeight	10.4
ZaO1	S_26	FS3991	diameterBreastHeight	19.1
ZaO1	S_26	FS3992	diameterBreastHeight	15.2
ZaO1	S_26	FS3993	diameterBreastHeight	8.8
ZaO1	S_26	FS3994	diameterBreastHeight	20.7
ZaO2	S_26	FS4000	diameterBreastHeight	135.3
ZaO2	S_26	FS4019	diameterBreastHeight	51.3
ZaO2	S_26	FS4037	diameterBreastHeight	25.8
ZaD3	S_26	FS4295	diameterBreastHeight	5.8
MaO4	S_27	FS2795	diameterBreastHeight	9.3
MaO4	S_27	FS2801	diameterBreastHeight	19.9
PaS1	S_27	FS3460	diameterBreastHeight	5.2
PaD5	S_28	FS3275	diameterBreastHeight	30
PaO3	S_29	FS2996	diameterBreastHeight	26.2
PaO2	S_29	FS3043	diameterBreastHeight	26
MaD3	S_30	FS2678	diameterBreastHeight	5.5
MaO1	S_30	FS2730	diameterBreastHeight	92
MaO1	S_30	FS2731	diameterBreastHeight	80
MaO2	S_30	FS2745	diameterBreastHeight	22
MaO5	S_30	FS2804	diameterBreastHeight	70.3
MaO5	S_30	FS2807	diameterBreastHeight	10.7
MaO5	S_30	FS2809	diameterBreastHeight	23.8
MaO5	S_30	FS2825	diameterBreastHeight	37.8
ChS1	S_31	FS722	diameterBreastHeight	15.9
ChS2	S_31	FS766	diameterBreastHeight	8.7
ChO3	S_31	FS934	diameterBreastHeight	11.5
ChS3	S_31	FS1078	diameterBreastHeight	6.9
ChS3	S_31	FS1079	diameterBreastHeight	7.7
ChS4	S_31	FS1133	diameterBreastHeight	13.9
ChS5	S_31	FS1165	diameterBreastHeight	21.6
ChS5	S_31	FS1166	diameterBreastHeight	34.7
PaS3	S_31	FS3398	diameterBreastHeight	5
ChO5	S_32	FS1029	diameterBreastHeight	15
PaD2	S_33	FS3159	diameterBreastHeight	5.4
PaD2	S_33	FS3166	diameterBreastHeight	6.8
PaD2	S_33	FS3182	diameterBreastHeight	6.2
PaD2	S_33	FS3195	diameterBreastHeight	7
PaD2	S_33	FS3202	diameterBreastHeight	6
PaD2	S_33	FS3203	diameterBreastHeight	5
PaD5	S_33	FS3264	diameterBreastHeight	11
PaD5	S_33	FS3267	diameterBreastHeight	12
PaD5	S_33	FS3270	diameterBreastHeight	6
MaD4	S_34	FS2692	diameterBreastHeight	11.2
MaD5	S_34	FS2704	diameterBreastHeight	33.4
MaS2	S_34	FS2856	diameterBreastHeight	66.4
MaS3	S_34	FS2872	diameterBreastHeight	10.5
MaO1	S_35	FS2732	diameterBreastHeight	7
MaO4	S_35	FS2794	diameterBreastHeight	29
ChS1	S_36	FS743	diameterBreastHeight	6
ChS2	S_36	FS759	diameterBreastHeight	13.6
ChS2	S_36	FS761	diameterBreastHeight	11.6
ChS2	S_36	FS773	diameterBreastHeight	12.5
ChS2	S_36	FS779	diameterBreastHeight	6
ChD1	S_36	FS802	diameterBreastHeight	10
ChO2	S_36	FS878	diameterBreastHeight	6.2
ChO2	S_36	FS879	diameterBreastHeight	5.5
ChO3	S_36	FS935	diameterBreastHeight	6
ChO5	S_36	FS1012	diameterBreastHeight	9.5
ChS5	S_36	FS1157	diameterBreastHeight	7.5
ChS5	S_36	FS1158	diameterBreastHeight	5.1
ChD3	S_36	FS1220	diameterBreastHeight	7.5
ChD3	S_36	FS1221	diameterBreastHeight	8.5
ChD3	S_36	FS1247	diameterBreastHeight	10
ChS1	S_37	FS728	diameterBreastHeight	33
ChD1	S_37	FS801	diameterBreastHeight	11
ChD1	S_37	FS803	diameterBreastHeight	27.5
ChD1	S_37	FS811	diameterBreastHeight	5
ChD1	S_37	FS812	diameterBreastHeight	7.5
ChD1	S_37	FS813	diameterBreastHeight	5.5
ChD1	S_37	FS814	diameterBreastHeight	9
ChD1	S_37	FS815	diameterBreastHeight	7
ChO1	S_37	FS819	diameterBreastHeight	23.1
ChO1	S_37	FS820	diameterBreastHeight	10.2
ChO1	S_37	FS823	diameterBreastHeight	14.7
ChO1	S_37	FS826	diameterBreastHeight	26.9
ChO1	S_37	FS827	diameterBreastHeight	18.9
ChO1	S_37	FS828	diameterBreastHeight	28
ChO1	S_37	FS833	diameterBreastHeight	22.7
ChO1	S_37	FS836	diameterBreastHeight	15.2
ChO1	S_37	FS846	diameterBreastHeight	6.6
ChO1	S_37	FS847	diameterBreastHeight	8.9
ChO1	S_37	FS848	diameterBreastHeight	5.4
ChO1	S_37	FS849	diameterBreastHeight	5.1
ChO1	S_37	FS850	diameterBreastHeight	6.7
ChO1	S_37	FS851	diameterBreastHeight	6.9
ChO1	S_37	FS852	diameterBreastHeight	9
ChD4	S_37	FS872	diameterBreastHeight	9
ChD4	S_37	FS873	diameterBreastHeight	5
ChD4	S_37	FS874	diameterBreastHeight	6
ChO2	S_37	FS890	diameterBreastHeight	11.6
ChO2	S_37	FS903	diameterBreastHeight	26.2
ChO2	S_37	FS910	diameterBreastHeight	18
ChO2	S_37	FS916	diameterBreastHeight	8
ChO2	S_37	FS917	diameterBreastHeight	5
ChO2	S_37	FS918	diameterBreastHeight	7.8
ChO2	S_37	FS919	diameterBreastHeight	7
ChO2	S_37	FS920	diameterBreastHeight	7.9
ChO2	S_37	FS921	diameterBreastHeight	6.1
ChO2	S_37	FS922	diameterBreastHeight	5.4
ChO2	S_37	FS923	diameterBreastHeight	7.3
ChO2	S_37	FS924	diameterBreastHeight	5.9
ChO2	S_37	FS925	diameterBreastHeight	7
ChO2	S_37	FS926	diameterBreastHeight	5.7
ChO2	S_37	FS927	diameterBreastHeight	5.6
ChO3	S_37	FS936	diameterBreastHeight	12
ChO3	S_37	FS937	diameterBreastHeight	15
ChO3	S_37	FS938	diameterBreastHeight	20.5
ChO3	S_37	FS939	diameterBreastHeight	11
ChO3	S_37	FS940	diameterBreastHeight	16
ChO3	S_37	FS941	diameterBreastHeight	12
ChO3	S_37	FS942	diameterBreastHeight	16
ChO3	S_37	FS943	diameterBreastHeight	10
ChO3	S_37	FS944	diameterBreastHeight	10.5
ChO3	S_37	FS945	diameterBreastHeight	8.6
ChO3	S_37	FS946	diameterBreastHeight	6
ChO3	S_37	FS947	diameterBreastHeight	7.3
ChO3	S_37	FS948	diameterBreastHeight	6.5
ChO4	S_37	FS968	diameterBreastHeight	25
ChO4	S_37	FS969	diameterBreastHeight	7.5
ChO4	S_37	FS970	diameterBreastHeight	22
ChO4	S_37	FS971	diameterBreastHeight	12
ChO4	S_37	FS972	diameterBreastHeight	10
ChO4	S_37	FS973	diameterBreastHeight	12
ChO4	S_37	FS974	diameterBreastHeight	11
ChO4	S_37	FS975	diameterBreastHeight	6.5
ChO4	S_37	FS976	diameterBreastHeight	8
ChO4	S_37	FS977	diameterBreastHeight	6
ChO4	S_37	FS978	diameterBreastHeight	7.5
ChO4	S_37	FS979	diameterBreastHeight	9
ChO4	S_37	FS980	diameterBreastHeight	6.5
ChO4	S_37	FS981	diameterBreastHeight	8.5
ChO4	S_37	FS982	diameterBreastHeight	6.5
ChO4	S_37	FS983	diameterBreastHeight	7.5
ChO5	S_37	FS1041	diameterBreastHeight	6.5
ChO5	S_37	FS1055	diameterBreastHeight	13.5
ChO5	S_37	FS1056	diameterBreastHeight	12.5
ChO5	S_37	FS1057	diameterBreastHeight	15.5
ChO5	S_37	FS1058	diameterBreastHeight	17.5
ChO5	S_37	FS1059	diameterBreastHeight	17
ChO5	S_37	FS1060	diameterBreastHeight	15.5
ChO5	S_37	FS1061	diameterBreastHeight	11.5
ChO5	S_37	FS1065	diameterBreastHeight	5.5
ChO5	S_37	FS1066	diameterBreastHeight	9.5
ChO5	S_37	FS1067	diameterBreastHeight	6
ChO5	S_37	FS1068	diameterBreastHeight	8
ChO5	S_37	FS1069	diameterBreastHeight	5.5
ChO5	S_37	FS1070	diameterBreastHeight	7
ChO5	S_37	FS1071	diameterBreastHeight	9
ChO5	S_37	FS1072	diameterBreastHeight	7
ChO5	S_37	FS1073	diameterBreastHeight	8
ChO5	S_37	FS1074	diameterBreastHeight	8
ChO5	S_37	FS1075	diameterBreastHeight	7.5
ChS3	S_37	FS1111	diameterBreastHeight	5.6
ChS3	S_37	FS1112	diameterBreastHeight	7.1
ChS3	S_37	FS1113	diameterBreastHeight	8.5
ChS3	S_37	FS1114	diameterBreastHeight	7.8
ChS3	S_37	FS1115	diameterBreastHeight	7
ChS4	S_37	FS1121	diameterBreastHeight	5.5
ChS4	S_37	FS1122	diameterBreastHeight	5.9
ChS4	S_37	FS1123	diameterBreastHeight	9.9
ChS4	S_37	FS1136	diameterBreastHeight	12.9
ChS4	S_37	FS1137	diameterBreastHeight	17.4
ChS4	S_37	FS1138	diameterBreastHeight	17.3
ChS4	S_37	FS1139	diameterBreastHeight	10.5
ChS4	S_37	FS1144	diameterBreastHeight	23.9
ChS4	S_37	FS1145	diameterBreastHeight	12.9
ChS5	S_37	FS1173	diameterBreastHeight	7
ChS5	S_37	FS1175	diameterBreastHeight	5
ChS5	S_37	FS1178	diameterBreastHeight	10.5
ChD5	S_37	FS1197	diameterBreastHeight	13.1
ChD5	S_37	FS1198	diameterBreastHeight	16.5
ChD2	S_37	FS1207	diameterBreastHeight	5.5
ChD3	S_37	FS1230	diameterBreastHeight	9
ChD3	S_37	FS1231	diameterBreastHeight	6.5
ChD3	S_37	FS1232	diameterBreastHeight	6
ChD3	S_37	FS1233	diameterBreastHeight	8
ChD3	S_37	FS1234	diameterBreastHeight	7.8
ChD3	S_37	FS1236	diameterBreastHeight	15
ChD3	S_37	FS1237	diameterBreastHeight	14
ChD3	S_37	FS1238	diameterBreastHeight	14
ChD3	S_37	FS1244	diameterBreastHeight	12
ChD1	S_38	FS806	diameterBreastHeight	6
ChD4	S_38	FS856	diameterBreastHeight	6
ChD4	S_38	FS857	diameterBreastHeight	18.5
ChD4	S_38	FS860	diameterBreastHeight	10.5
ChD4	S_38	FS862	diameterBreastHeight	22
ChD4	S_38	FS866	diameterBreastHeight	21
ChD2	S_38	FS1203	diameterBreastHeight	7
ChD2	S_38	FS1209	diameterBreastHeight	10.5
CaO4	S_39	FS134	diameterBreastHeight	9
CaO5	S_39	FS145	diameterBreastHeight	26.4
CaD1	S_39	FS202	diameterBreastHeight	5.6
CaD1	S_39	FS234	diameterBreastHeight	5.2
CaD1	S_39	FS235	diameterBreastHeight	20.7
CaD1	S_39	FS236	diameterBreastHeight	9.3
CaD1	S_39	FS237	diameterBreastHeight	20.2
CaD5	S_39	FS410	diameterBreastHeight	48.9
EnD1	S_39	FS2251	diameterBreastHeight	39.8
ZaD1	S_40	FS4180	diameterBreastHeight	9.9
ZaD1	S_40	FS4182	diameterBreastHeight	11.8
ZaD1	S_40	FS4200	diameterBreastHeight	7
ZaO2	S_41	FS4009	diameterBreastHeight	12.7
ZaS2	S_41	FS4422	diameterBreastHeight	17.2
ChD1	S_42	FS791	diameterBreastHeight	13
ChD4	S_42	FS854	diameterBreastHeight	6
ChD4	S_42	FS855	diameterBreastHeight	9
ChO2	S_42	FS880	diameterBreastHeight	7.5
ChO2	S_42	FS888	diameterBreastHeight	12.7
ChO5	S_42	FS1013	diameterBreastHeight	6.5
ChO5	S_42	FS1014	diameterBreastHeight	7
ChO5	S_42	FS1015	diameterBreastHeight	5
ChO5	S_42	FS1016	diameterBreastHeight	6
ChO5	S_42	FS1031	diameterBreastHeight	13
ChS3	S_42	FS1081	diameterBreastHeight	5
ChS3	S_42	FS1110	diameterBreastHeight	29.2
ChS5	S_42	FS1168	diameterBreastHeight	11.4
ChD5	S_42	FS1185	diameterBreastHeight	7
ChD2	S_42	FS1201	diameterBreastHeight	5.5
ChD2	S_42	FS1202	diameterBreastHeight	6
ChD3	S_42	FS1222	diameterBreastHeight	6
ChD3	S_42	FS1223	diameterBreastHeight	5
ChD3	S_42	FS1224	diameterBreastHeight	8
ChD3	S_42	FS1245	diameterBreastHeight	13
MaD3	S_42	FS2683	diameterBreastHeight	10.5
PaO4	S_42	FS2960	diameterBreastHeight	19
PaS3	S_42	FS3414	diameterBreastHeight	19.2
CaO5	S_43	FS148	diameterBreastHeight	7.3
CaD5	S_43	FS408	diameterBreastHeight	6.4
EnD4	S_43	FS2373	diameterBreastHeight	8.9
ZaO2	S_44	FS4039	diameterBreastHeight	15.9
ZaO5	S_44	FS4136	diameterBreastHeight	5.5
ZaO5	S_44	FS4176	diameterBreastHeight	6
ZaO5	S_44	FS4179	diameterBreastHeight	9
CaO1	S_46	FS15	diameterBreastHeight	36
CaO3	S_46	FS80	diameterBreastHeight	46
CaD1	S_46	FS193	diameterBreastHeight	9.2
CaD1	S_46	FS223	diameterBreastHeight	21.3
CaD1	S_46	FS226	diameterBreastHeight	44.3
CaD3	S_46	FS307	diameterBreastHeight	15.5
CaD4	S_46	FS372	diameterBreastHeight	36
CaD5	S_46	FS396	diameterBreastHeight	58.1
CaD5	S_46	FS417	diameterBreastHeight	59.9
ZaD2	S_46	FS4224	diameterBreastHeight	36.5
ZaD2	S_46	FS4225	diameterBreastHeight	12.4
ZaD2	S_46	FS4231	diameterBreastHeight	19.1
ZaD2	S_46	FS4234	diameterBreastHeight	8.6
ZaD2	S_46	FS4235	diameterBreastHeight	16.4
ZaD2	S_46	FS4236	diameterBreastHeight	16.6
ZaD2	S_46	FS4237	diameterBreastHeight	9.6
ZaD2	S_46	FS4239	diameterBreastHeight	29.1
ZaD3	S_46	FS4294	diameterBreastHeight	10.7
ZaD4	S_46	FS4313	diameterBreastHeight	7.5
ZaD4	S_46	FS4319	diameterBreastHeight	32.4
ZaD5	S_46	FS4369	diameterBreastHeight	6
ZaD5	S_46	FS4375	diameterBreastHeight	6
ZaD5	S_46	FS4377	diameterBreastHeight	10
ZaS2	S_46	FS4410	diameterBreastHeight	12.1
ZaS2	S_46	FS4431	diameterBreastHeight	21.7
ZaS2	S_46	FS4433	diameterBreastHeight	10.2
ZaS3	S_46	FS4463	diameterBreastHeight	9.5
ZaS3	S_46	FS4464	diameterBreastHeight	9.5
ZaS3	S_46	FS4465	diameterBreastHeight	14
ZaS3	S_46	FS4466	diameterBreastHeight	8.7
ZaS3	S_46	FS4467	diameterBreastHeight	16.5
ZaS3	S_46	FS4469	diameterBreastHeight	10.3
ZaS3	S_46	FS4470	diameterBreastHeight	19.3
ZaS3	S_46	FS4481	diameterBreastHeight	5.5
ZaS3	S_46	FS4482	diameterBreastHeight	6.5
ZaS3	S_46	FS4493	diameterBreastHeight	7.2
ZaS3	S_46	FS4503	diameterBreastHeight	6
ZaS3	S_46	FS4506	diameterBreastHeight	5.5
ZaS3	S_46	FS4508	diameterBreastHeight	9.2
ZaS3	S_46	FS4511	diameterBreastHeight	10
ZaS3	S_46	FS4514	diameterBreastHeight	6.4
ZaS4	S_46	FS4522	diameterBreastHeight	15.2
ZaS4	S_46	FS4525	diameterBreastHeight	12
ZaS4	S_46	FS4527	diameterBreastHeight	14.7
ZaS4	S_46	FS4530	diameterBreastHeight	8.4
ZaS4	S_46	FS4532	diameterBreastHeight	10.8
ZaS4	S_46	FS4535	diameterBreastHeight	6.5
ZaS4	S_46	FS4541	diameterBreastHeight	32.8
ZaS4	S_46	FS4555	diameterBreastHeight	6.4
ZaS4	S_46	FS4556	diameterBreastHeight	5.4
ZaS5	S_46	FS4563	diameterBreastHeight	20.5
ZaS5	S_46	FS4565	diameterBreastHeight	6.5
ZaS5	S_46	FS4566	diameterBreastHeight	10
ZaS5	S_46	FS4573	diameterBreastHeight	8.5
ZaS5	S_46	FS4574	diameterBreastHeight	11.5
ZaS5	S_46	FS4590	diameterBreastHeight	6
ZaS5	S_46	FS4592	diameterBreastHeight	10
EnO1	S_47	FS2027	diameterBreastHeight	8.7
EnO1	S_47	FS2031	diameterBreastHeight	12.3
EnO1	S_47	FS2032	diameterBreastHeight	16
EnO2	S_47	FS2085	diameterBreastHeight	59.9
EnO2	S_47	FS2090	diameterBreastHeight	88.5
EnO2	S_47	FS2092	diameterBreastHeight	5.8
EnO2	S_47	FS2093	diameterBreastHeight	14.8
EnO2	S_47	FS2110	diameterBreastHeight	11
EnO2	S_47	FS2113	diameterBreastHeight	7.4
EnO4	S_47	FS2160	diameterBreastHeight	24.2
EnD1	S_47	FS2234	diameterBreastHeight	16.1
EnD1	S_47	FS2244	diameterBreastHeight	6
EnD1	S_47	FS2245	diameterBreastHeight	6
EnD1	S_47	FS2248	diameterBreastHeight	8.3
EnD1	S_47	FS2258	diameterBreastHeight	5.9
EnD1	S_47	FS2262	diameterBreastHeight	6.7
EnD1	S_47	FS2265	diameterBreastHeight	11.8
EnD3	S_47	FS2333	diameterBreastHeight	6.4
EnD3	S_47	FS2362	diameterBreastHeight	6.4
EnD4	S_47	FS2365	diameterBreastHeight	6.8
EnD4	S_47	FS2368	diameterBreastHeight	13.7
EnD4	S_47	FS2381	diameterBreastHeight	5.9
EnD4	S_47	FS2389	diameterBreastHeight	8.4
EnD4	S_47	FS2398	diameterBreastHeight	9.4
EnD4	S_47	FS2404	diameterBreastHeight	5.4
EnD5	S_47	FS2431	diameterBreastHeight	7.9
CaO2	S_48	FS48	diameterBreastHeight	29.9
PaS2	S_49	FS3436	diameterBreastHeight	5.1
PaS2	S_49	FS3438	diameterBreastHeight	6.3
PaS2	S_49	FS3441	diameterBreastHeight	66
MaD4	S_50	FS2693	diameterBreastHeight	44.7
MaS3	S_51	FS2873	diameterBreastHeight	26
MaS3	S_51	FS2874	diameterBreastHeight	14.3
MaS3	S_51	FS2875	diameterBreastHeight	10.5
MaS3	S_51	FS2876	diameterBreastHeight	39.1
MaS3	S_51	FS2877	diameterBreastHeight	26
PaO5	S_52	FS2929	diameterBreastHeight	6
PaO3	S_52	FS3011	diameterBreastHeight	7.6
PaO2	S_52	FS3037	diameterBreastHeight	17
PaO2	S_52	FS3048	diameterBreastHeight	9
PaD3	S_52	FS3084	diameterBreastHeight	5
PaD3	S_52	FS3091	diameterBreastHeight	5
PaD2	S_52	FS3160	diameterBreastHeight	5
PaD2	S_52	FS3165	diameterBreastHeight	7
PaD2	S_52	FS3168	diameterBreastHeight	6.2
PaD2	S_52	FS3171	diameterBreastHeight	6.5
PaD1	S_52	FS3222	diameterBreastHeight	11.5
PaD1	S_52	FS3234	diameterBreastHeight	6
CaD5	S_53	FS413	diameterBreastHeight	6.7
MaO1	S_54	FS2733	diameterBreastHeight	10
MaO1	S_54	FS2734	diameterBreastHeight	14.4
MaO1	S_54	FS2735	diameterBreastHeight	11.6
MaO1	S_54	FS2736	diameterBreastHeight	25.5
MaO1	S_54	FS2737	diameterBreastHeight	21.2
MaO1	S_54	FS2738	diameterBreastHeight	48.3
PaO5	S_55	FS2932	diameterBreastHeight	7
PaO5	S_55	FS2940	diameterBreastHeight	6
PaO5	S_55	FS2941	diameterBreastHeight	7.5
PaO3	S_55	FS3009	diameterBreastHeight	11.5
PaO3	S_55	FS3012	diameterBreastHeight	12
PaO2	S_55	FS3029	diameterBreastHeight	5
PaO2	S_55	FS3041	diameterBreastHeight	12
PaO2	S_55	FS3044	diameterBreastHeight	5
PaO2	S_55	FS3050	diameterBreastHeight	13
PaO1	S_55	FS3054	diameterBreastHeight	6.1
PaD5	S_55	FS3265	diameterBreastHeight	9
ChS2	S_56	FS780	diameterBreastHeight	6.7
ChO2	S_56	FS881	diameterBreastHeight	5.6
MaO2	S_56	FS2748	diameterBreastHeight	6.7
MaO3	S_56	FS2766	diameterBreastHeight	7.5
EnO1	S_57	FS2042	diameterBreastHeight	13.6
EnO5	S_57	FS2169	diameterBreastHeight	33.9
EnS5	S_57	FS2593	diameterBreastHeight	15.3
EnS5	S_57	FS2594	diameterBreastHeight	23.3
EnS5	S_57	FS2595	diameterBreastHeight	19
EnS5	S_57	FS2596	diameterBreastHeight	15.4
EnS5	S_57	FS2597	diameterBreastHeight	18.5
EnS5	S_57	FS2598	diameterBreastHeight	25
EnS5	S_57	FS2599	diameterBreastHeight	23.5
EnS5	S_57	FS2600	diameterBreastHeight	21.5
EnS5	S_57	FS2601	diameterBreastHeight	23
EnS5	S_57	FS2602	diameterBreastHeight	15.5
EnS5	S_57	FS2603	diameterBreastHeight	23.1
EnS5	S_57	FS2604	diameterBreastHeight	18.3
EnS5	S_57	FS2605	diameterBreastHeight	19
EnS5	S_57	FS2606	diameterBreastHeight	15.4
EnS5	S_57	FS2607	diameterBreastHeight	16.5
EnS5	S_57	FS2608	diameterBreastHeight	18
EnS5	S_57	FS2609	diameterBreastHeight	21.7
EnS5	S_57	FS2610	diameterBreastHeight	13.3
EnS5	S_57	FS2611	diameterBreastHeight	16
EnS5	S_57	FS2612	diameterBreastHeight	16.1
EnS5	S_57	FS2613	diameterBreastHeight	18.5
EnS5	S_57	FS2614	diameterBreastHeight	24
EnS5	S_57	FS2615	diameterBreastHeight	19.5
EnS5	S_57	FS2616	diameterBreastHeight	12.5
EnS5	S_57	FS2617	diameterBreastHeight	12
EnS5	S_57	FS2618	diameterBreastHeight	17.5
EnS5	S_57	FS2619	diameterBreastHeight	15.5
EnS5	S_57	FS2620	diameterBreastHeight	16.3
EnS5	S_57	FS2621	diameterBreastHeight	19.4
EnS5	S_57	FS2622	diameterBreastHeight	18
EnS5	S_57	FS2623	diameterBreastHeight	18.3
EnS5	S_57	FS2624	diameterBreastHeight	15
EnS5	S_57	FS2625	diameterBreastHeight	13.7
EnS5	S_57	FS2626	diameterBreastHeight	16.3
EnS5	S_57	FS2627	diameterBreastHeight	6.1
EnS5	S_57	FS2628	diameterBreastHeight	15
EnS5	S_57	FS2630	diameterBreastHeight	21.7
EnS5	S_57	FS2631	diameterBreastHeight	17
EnS5	S_57	FS2635	diameterBreastHeight	16
EnS5	S_57	FS2636	diameterBreastHeight	11.5
EnS5	S_57	FS2642	diameterBreastHeight	14.5
EnS5	S_57	FS2643	diameterBreastHeight	19.4
EnS5	S_57	FS2644	diameterBreastHeight	15
EnS5	S_57	FS2645	diameterBreastHeight	23.5
EnS5	S_57	FS2646	diameterBreastHeight	17.7
EnS5	S_57	FS2647	diameterBreastHeight	22.6
EnS5	S_57	FS2648	diameterBreastHeight	13.2
EnS5	S_57	FS2649	diameterBreastHeight	22.3
EnS5	S_57	FS2650	diameterBreastHeight	28.2
EnS5	S_57	FS2651	diameterBreastHeight	24.8
ChS1	S_58	FS724	diameterBreastHeight	39
ChS1	S_58	FS744	diameterBreastHeight	28
ChS1	S_58	FS745	diameterBreastHeight	7
ChD1	S_58	FS809	diameterBreastHeight	5
ChD1	S_58	FS810	diameterBreastHeight	8.5
ChO3	S_58	FS949	diameterBreastHeight	95
ChO5	S_58	FS1032	diameterBreastHeight	26
ChO5	S_58	FS1048	diameterBreastHeight	24
ChS5	S_58	FS1169	diameterBreastHeight	56
ChD2	S_58	FS1210	diameterBreastHeight	30
ChD3	S_58	FS1229	diameterBreastHeight	7
ZaO2	S_58	FS4002	diameterBreastHeight	5.9
ZaO2	S_58	FS4021	diameterBreastHeight	5.6
MaD4	S_59	FS2694	diameterBreastHeight	35.4
MaO5	S_59	FS2810	diameterBreastHeight	5.6
MaO5	S_59	FS2815	diameterBreastHeight	10.5
MaO5	S_59	FS2816	diameterBreastHeight	5.6
MaO5	S_59	FS2837	diameterBreastHeight	7.5
ChS1	S_60	FS746	diameterBreastHeight	6.5
ChO4	S_60	FS984	diameterBreastHeight	8.5
ChS3	S_60	FS1082	diameterBreastHeight	7.7
ChS3	S_60	FS1083	diameterBreastHeight	5
ChS3	S_60	FS1084	diameterBreastHeight	9.7
ChS3	S_60	FS1085	diameterBreastHeight	5.4
ChS3	S_60	FS1086	diameterBreastHeight	5.6
ChS4	S_60	FS1143	diameterBreastHeight	20.4
ChS5	S_60	FS1159	diameterBreastHeight	6.4
ChS5	S_60	FS1170	diameterBreastHeight	17
ChS5	S_60	FS1171	diameterBreastHeight	12.4
ZaO2	S_61	FS3999	diameterBreastHeight	12.7
ZaS2	S_61	FS4451	diameterBreastHeight	10.5
ZaS2	S_61	FS4452	diameterBreastHeight	13.7
MaD1	S_63	FS2654	diameterBreastHeight	99
MaD1	S_63	FS2655	diameterBreastHeight	25.8
MaD1	S_63	FS2656	diameterBreastHeight	61.6
MaD1	S_63	FS2657	diameterBreastHeight	51.2
MaD1	S_63	FS2658	diameterBreastHeight	63.9
MaD1	S_63	FS2659	diameterBreastHeight	79.4
MaD2	S_63	FS2674	diameterBreastHeight	53.1
MaO4	S_63	FS2803	diameterBreastHeight	69.9
MaO3	S_64	FS2784	diameterBreastHeight	41
MaO4	S_65	FS2797	diameterBreastHeight	13.9
MaO4	S_65	FS2798	diameterBreastHeight	6.8
MaO4	S_65	FS2799	diameterBreastHeight	5.8
MaO5	S_65	FS2839	diameterBreastHeight	47.3
ChD1	S_66	FS796	diameterBreastHeight	70
ChD1	S_66	FS797	diameterBreastHeight	66
ChO1	S_66	FS824	diameterBreastHeight	10.4
ChO1	S_66	FS832	diameterBreastHeight	12
ChO1	S_66	FS841	diameterBreastHeight	8.7
ChO1	S_66	FS842	diameterBreastHeight	5.7
ChO1	S_66	FS843	diameterBreastHeight	5.5
ChD4	S_66	FS870	diameterBreastHeight	9.5
ChD4	S_66	FS871	diameterBreastHeight	5.5
ChO3	S_66	FS950	diameterBreastHeight	10.5
ChO3	S_66	FS951	diameterBreastHeight	15
ChD5	S_66	FS1186	diameterBreastHeight	7.6
ChD5	S_66	FS1188	diameterBreastHeight	9.3
ChD5	S_66	FS1195	diameterBreastHeight	10.6
ChD3	S_66	FS1227	diameterBreastHeight	6.5
PaD2	S_66	FS3167	diameterBreastHeight	13
PaD2	S_66	FS3169	diameterBreastHeight	23
PaD1	S_66	FS3228	diameterBreastHeight	6.8
PaD1	S_66	FS3231	diameterBreastHeight	6.8
PaD1	S_66	FS3243	diameterBreastHeight	19
PaD1	S_66	FS3244	diameterBreastHeight	7
PaD1	S_66	FS3245	diameterBreastHeight	7
PaD5	S_66	FS3256	diameterBreastHeight	11
ZaS1	S_67	FS4396	diameterBreastHeight	14.1
CaS3	S_68	FS532	diameterBreastHeight	11.5
CaS3	S_68	FS534	diameterBreastHeight	10
CaS3	S_68	FS535	diameterBreastHeight	8.8
CaS3	S_68	FS536	diameterBreastHeight	6.2
CaS3	S_68	FS538	diameterBreastHeight	10
CaS3	S_68	FS540	diameterBreastHeight	10.5
CaS3	S_68	FS541	diameterBreastHeight	5
CaS3	S_68	FS542	diameterBreastHeight	5.6
CaS3	S_68	FS544	diameterBreastHeight	7.1
CaS3	S_68	FS545	diameterBreastHeight	10.3
CaS3	S_68	FS546	diameterBreastHeight	10.7
CaS3	S_68	FS547	diameterBreastHeight	7.7
CaS3	S_68	FS548	diameterBreastHeight	37.5
CaS3	S_68	FS549	diameterBreastHeight	7.8
CaS3	S_68	FS550	diameterBreastHeight	10.5
CaS3	S_68	FS551	diameterBreastHeight	5.5
CaS3	S_68	FS553	diameterBreastHeight	5.5
CaS3	S_68	FS561	diameterBreastHeight	8
CaS3	S_68	FS577	diameterBreastHeight	6.8
CaS3	S_68	FS581	diameterBreastHeight	19
CaS3	S_68	FS583	diameterBreastHeight	8
CaS3	S_68	FS584	diameterBreastHeight	8.5
CaS4	S_68	FS592	diameterBreastHeight	26
CaS4	S_68	FS599	diameterBreastHeight	10.5
CaS4	S_68	FS600	diameterBreastHeight	8.6
CaS4	S_68	FS604	diameterBreastHeight	10
CaS4	S_68	FS606	diameterBreastHeight	9.1
CaS4	S_68	FS609	diameterBreastHeight	9.2
CaS4	S_68	FS610	diameterBreastHeight	21.4
CaS4	S_68	FS611	diameterBreastHeight	13.3
CaS4	S_68	FS612	diameterBreastHeight	5
CaS4	S_68	FS616	diameterBreastHeight	11.5
CaS4	S_68	FS623	diameterBreastHeight	6.7
CaS4	S_68	FS625	diameterBreastHeight	7.7
CaS4	S_68	FS632	diameterBreastHeight	8.5
CaS4	S_68	FS633	diameterBreastHeight	11
CaS4	S_68	FS637	diameterBreastHeight	7
CaS4	S_68	FS640	diameterBreastHeight	9.1
CaS4	S_68	FS641	diameterBreastHeight	11.5
CaS4	S_68	FS642	diameterBreastHeight	8.3
CaS4	S_68	FS645	diameterBreastHeight	13
CaS4	S_68	FS648	diameterBreastHeight	12.5
CaS4	S_68	FS652	diameterBreastHeight	11
CaS4	S_68	FS654	diameterBreastHeight	8.5
CaS5	S_68	FS662	diameterBreastHeight	12.2
CaD5	S_68	FS411	diameterBreastHeight	9.3
CaD5	S_68	FS412	diameterBreastHeight	8.5
CaD5	S_68	FS414	diameterBreastHeight	6.3
CaD5	S_68	FS416	diameterBreastHeight	9.9
CaS1	S_68	FS418	diameterBreastHeight	49.8
CaS2	S_68	FS450	diameterBreastHeight	5
CaS2	S_68	FS451	diameterBreastHeight	6.7
CaS2	S_68	FS452	diameterBreastHeight	11
CaS2	S_68	FS454	diameterBreastHeight	14.1
CaS2	S_68	FS456	diameterBreastHeight	13
CaS2	S_68	FS457	diameterBreastHeight	6
CaS2	S_68	FS459	diameterBreastHeight	6.5
CaS2	S_68	FS460	diameterBreastHeight	5
CaS2	S_68	FS461	diameterBreastHeight	15
CaS2	S_68	FS462	diameterBreastHeight	8
CaS2	S_68	FS464	diameterBreastHeight	7
CaS2	S_68	FS466	diameterBreastHeight	8
CaS2	S_68	FS470	diameterBreastHeight	8.9
CaS2	S_68	FS471	diameterBreastHeight	9.3
CaS2	S_68	FS472	diameterBreastHeight	12.4
CaS2	S_68	FS480	diameterBreastHeight	13.5
CaS2	S_68	FS482	diameterBreastHeight	12
CaS2	S_68	FS486	diameterBreastHeight	7.6
CaS2	S_68	FS487	diameterBreastHeight	6.3
CaS2	S_68	FS493	diameterBreastHeight	7
CaS2	S_68	FS494	diameterBreastHeight	9.4
CaS2	S_68	FS497	diameterBreastHeight	6
CaS2	S_68	FS498	diameterBreastHeight	9
CaS2	S_68	FS499	diameterBreastHeight	9
CaS2	S_68	FS500	diameterBreastHeight	7.5
CaS2	S_68	FS501	diameterBreastHeight	6
CaS2	S_68	FS502	diameterBreastHeight	12.5
CaS2	S_68	FS504	diameterBreastHeight	6.5
CaS2	S_68	FS505	diameterBreastHeight	6
CaS2	S_68	FS506	diameterBreastHeight	11
CaS2	S_68	FS507	diameterBreastHeight	11.3
CaS2	S_68	FS511	diameterBreastHeight	9
CaS2	S_68	FS512	diameterBreastHeight	6.5
CaS2	S_68	FS513	diameterBreastHeight	6.5
CaS2	S_68	FS514	diameterBreastHeight	6.6
CaS2	S_68	FS515	diameterBreastHeight	5.5
CaS2	S_68	FS518	diameterBreastHeight	8.8
CaS2	S_68	FS520	diameterBreastHeight	6.5
CaS2	S_68	FS521	diameterBreastHeight	8.7
CaS3	S_68	FS525	diameterBreastHeight	10
CaS3	S_68	FS527	diameterBreastHeight	17.1
CaS3	S_68	FS528	diameterBreastHeight	13
PaS5	S_69	FS3324	diameterBreastHeight	15.4
PaS5	S_69	FS3330	diameterBreastHeight	12.4
PaS5	S_69	FS3331	diameterBreastHeight	8.9
PaS5	S_69	FS3344	diameterBreastHeight	5.8
PaD5	S_70	FS3255	diameterBreastHeight	12
ChS1	S_71	FS718	diameterBreastHeight	12
ChS1	S_71	FS747	diameterBreastHeight	5.5
ChS1	S_71	FS748	diameterBreastHeight	5.5
ChS1	S_71	FS749	diameterBreastHeight	5
ChS1	S_71	FS750	diameterBreastHeight	5.5
ChS2	S_71	FS758	diameterBreastHeight	25.4
ChS2	S_71	FS762	diameterBreastHeight	17.5
ChS2	S_71	FS764	diameterBreastHeight	10.5
ChD1	S_71	FS805	diameterBreastHeight	20
ChD4	S_71	FS864	diameterBreastHeight	28.5
ChO2	S_71	FS889	diameterBreastHeight	20.8
ChO4	S_71	FS985	diameterBreastHeight	8.5
ChO4	S_71	FS986	diameterBreastHeight	6.5
ChO4	S_71	FS987	diameterBreastHeight	7.5
ChO4	S_71	FS988	diameterBreastHeight	6.5
ChO4	S_71	FS989	diameterBreastHeight	8
ChO4	S_71	FS990	diameterBreastHeight	47.5
ChO4	S_71	FS991	diameterBreastHeight	36
ChO5	S_71	FS1017	diameterBreastHeight	5.5
ChO5	S_71	FS1018	diameterBreastHeight	8
ChO5	S_71	FS1019	diameterBreastHeight	8
ChO5	S_71	FS1033	diameterBreastHeight	36
ChO5	S_71	FS1034	diameterBreastHeight	11.5
ChO5	S_71	FS1035	diameterBreastHeight	32
ChO5	S_71	FS1036	diameterBreastHeight	10
ChO5	S_71	FS1038	diameterBreastHeight	10
ChS3	S_71	FS1100	diameterBreastHeight	15.8
ChS3	S_71	FS1101	diameterBreastHeight	17.5
ChS4	S_71	FS1140	diameterBreastHeight	12.5
ChS4	S_71	FS1141	diameterBreastHeight	22.2
ChS5	S_71	FS1172	diameterBreastHeight	26.8
ChD5	S_71	FS1187	diameterBreastHeight	7.6
ChD2	S_71	FS1211	diameterBreastHeight	38
ChD3	S_71	FS1241	diameterBreastHeight	40
ChD3	S_71	FS1246	diameterBreastHeight	28
PaO4	S_71	FS2986	diameterBreastHeight	8.8
PaO4	S_71	FS2989	diameterBreastHeight	5
PaO4	S_71	FS2991	diameterBreastHeight	7
PaD3	S_71	FS3068	diameterBreastHeight	10
PaD3	S_71	FS3069	diameterBreastHeight	7.5
PaD3	S_71	FS3073	diameterBreastHeight	14.8
PaD3	S_71	FS3074	diameterBreastHeight	12.5
PaD3	S_71	FS3075	diameterBreastHeight	10
PaD3	S_71	FS3077	diameterBreastHeight	13
PaD3	S_71	FS3078	diameterBreastHeight	6.8
PaD3	S_71	FS3080	diameterBreastHeight	12.5
PaD3	S_71	FS3082	diameterBreastHeight	13
PaD3	S_71	FS3083	diameterBreastHeight	40
PaD3	S_71	FS3085	diameterBreastHeight	21.5
PaD3	S_71	FS3089	diameterBreastHeight	10
PaD3	S_71	FS3090	diameterBreastHeight	8
PaD3	S_71	FS3093	diameterBreastHeight	11
PaD3	S_71	FS3096	diameterBreastHeight	17.5
PaD3	S_71	FS3099	diameterBreastHeight	9
PaD3	S_71	FS3103	diameterBreastHeight	8
PaD3	S_71	FS3104	diameterBreastHeight	9.5
PaD3	S_71	FS3105	diameterBreastHeight	9.5
PaD3	S_71	FS3106	diameterBreastHeight	5.5
PaD3	S_71	FS3107	diameterBreastHeight	9
PaD2	S_71	FS3161	diameterBreastHeight	47
PaD2	S_71	FS3162	diameterBreastHeight	5.4
PaD2	S_71	FS3174	diameterBreastHeight	10
PaD2	S_71	FS3185	diameterBreastHeight	21
PaD1	S_71	FS3217	diameterBreastHeight	6
PaD1	S_71	FS3221	diameterBreastHeight	16
PaD1	S_71	FS3226	diameterBreastHeight	41
PaD1	S_71	FS3227	diameterBreastHeight	7.5
PaD4	S_71	FS3289	diameterBreastHeight	10.1
PaD4	S_71	FS3290	diameterBreastHeight	11.4
PaD4	S_71	FS3294	diameterBreastHeight	17.2
PaD4	S_71	FS3299	diameterBreastHeight	19.5
PaD4	S_71	FS3302	diameterBreastHeight	55.7
PaD4	S_71	FS3305	diameterBreastHeight	6.6
PaD4	S_71	FS3307	diameterBreastHeight	5
PaD4	S_71	FS3308	diameterBreastHeight	11.3
PaD4	S_71	FS3310	diameterBreastHeight	10.7
PaD4	S_71	FS3314	diameterBreastHeight	7.6
PaD4	S_71	FS3316	diameterBreastHeight	9.2
PaS5	S_71	FS3319	diameterBreastHeight	17.2
PaS5	S_71	FS3320	diameterBreastHeight	15.1
PaS5	S_71	FS3322	diameterBreastHeight	9.1
PaS5	S_71	FS3326	diameterBreastHeight	6
PaS5	S_71	FS3328	diameterBreastHeight	23.1
PaS5	S_71	FS3332	diameterBreastHeight	11.1
PaS5	S_71	FS3336	diameterBreastHeight	7.3
PaS5	S_71	FS3337	diameterBreastHeight	6.6
PaS5	S_71	FS3338	diameterBreastHeight	5.6
PaS5	S_71	FS3341	diameterBreastHeight	5.6
PaS5	S_71	FS3342	diameterBreastHeight	5.5
PaS5	S_71	FS3348	diameterBreastHeight	5.5
PaS5	S_71	FS3350	diameterBreastHeight	21.4
PaS1	S_71	FS3475	diameterBreastHeight	6.2
PaS1	S_71	FS3480	diameterBreastHeight	7.2
PaS1	S_71	FS3481	diameterBreastHeight	9
MaS2	S_72	FS2857	diameterBreastHeight	10
MaD3	S_73	FS2681	diameterBreastHeight	78.9
MaO3	S_73	FS2774	diameterBreastHeight	16.1
ChO3	S_74	FS952	diameterBreastHeight	7
ChD5	S_74	FS1192	diameterBreastHeight	49.4
ChD5	S_74	FS1193	diameterBreastHeight	12.1
ChD2	S_74	FS1212	diameterBreastHeight	13
PaO5	S_74	FS2931	diameterBreastHeight	7
PaD5	S_74	FS3248	diameterBreastHeight	29.5
PaD5	S_74	FS3284	diameterBreastHeight	20
PaS4	S_74	FS3351	diameterBreastHeight	7.9
PaS4	S_74	FS3359	diameterBreastHeight	9
MaD5	S_75	FS2706	diameterBreastHeight	52.2
MaD5	S_75	FS2707	diameterBreastHeight	10
MaD5	S_75	FS2708	diameterBreastHeight	20.6
MaD5	S_75	FS2709	diameterBreastHeight	42.1
MaD5	S_75	FS2710	diameterBreastHeight	25.1
MaO5	S_75	FS2806	diameterBreastHeight	13.9
MaO5	S_75	FS2814	diameterBreastHeight	7.3
MaO2	S_76	FS2752	diameterBreastHeight	77.3
MaO2	S_76	FS2757	diameterBreastHeight	11.4
MaO2	S_76	FS2758	diameterBreastHeight	27
PaO3	S_77	FS3006	diameterBreastHeight	95
PaS4	S_77	FS3360	diameterBreastHeight	5.2
PaS4	S_77	FS3378	diameterBreastHeight	12.4
PaS4	S_77	FS3389	diameterBreastHeight	6.3
PaS1	S_77	FS3452	diameterBreastHeight	5.3
PaS1	S_77	FS3488	diameterBreastHeight	5
PaD3	S_78	FS3110	diameterBreastHeight	68
PaD2	S_78	FS3155	diameterBreastHeight	38.5
PaD2	S_78	FS3156	diameterBreastHeight	12
PaD2	S_78	FS3157	diameterBreastHeight	6
PaD2	S_78	FS3158	diameterBreastHeight	10.3
PaD2	S_78	FS3179	diameterBreastHeight	83
PaD2	S_78	FS3180	diameterBreastHeight	23.5
PaD2	S_78	FS3186	diameterBreastHeight	12.5
PaD2	S_78	FS3199	diameterBreastHeight	28.4
PaD2	S_78	FS3205	diameterBreastHeight	63.5
PaD2	S_78	FS3208	diameterBreastHeight	25
PaD4	S_78	FS3300	diameterBreastHeight	11.1
PaS1	S_78	FS3466	diameterBreastHeight	9.2
ChS3	S_79	FS1087	diameterBreastHeight	9.3
ChS3	S_79	FS1088	diameterBreastHeight	5.6
ChS3	S_79	FS1089	diameterBreastHeight	6.5
ChS3	S_79	FS1090	diameterBreastHeight	7.8
ChS3	S_79	FS1091	diameterBreastHeight	6.5
ChS3	S_79	FS1108	diameterBreastHeight	24.3
ChD3	S_79	FS1242	diameterBreastHeight	14
ChD3	S_79	FS1243	diameterBreastHeight	16
MaO2	S_80	FS2751	diameterBreastHeight	7.5
MaS3	S_80	FS2878	diameterBreastHeight	72.5
MaS3	S_80	FS2879	diameterBreastHeight	11.8
MaS3	S_80	FS2880	diameterBreastHeight	9.8
MaS3	S_80	FS2881	diameterBreastHeight	8.1
MaS3	S_80	FS2882	diameterBreastHeight	11.3
MaS3	S_80	FS2883	diameterBreastHeight	8
MaS3	S_80	FS2884	diameterBreastHeight	10.2
MaS3	S_80	FS2885	diameterBreastHeight	9.5
MaS3	S_80	FS2886	diameterBreastHeight	7
MaS3	S_80	FS2887	diameterBreastHeight	10
MaS3	S_80	FS2888	diameterBreastHeight	9.5
MaS3	S_80	FS2896	diameterBreastHeight	20.8
MaS4	S_80	FS2899	diameterBreastHeight	9
MaS4	S_80	FS2900	diameterBreastHeight	10.5
MaS4	S_80	FS2901	diameterBreastHeight	8
MaS4	S_80	FS2902	diameterBreastHeight	8.4
MaS4	S_80	FS2903	diameterBreastHeight	12.4
MaS4	S_80	FS2904	diameterBreastHeight	17.2
MaS4	S_80	FS2905	diameterBreastHeight	23.9
MaS4	S_80	FS2906	diameterBreastHeight	16
MaS5	S_80	FS2910	diameterBreastHeight	25
MaS5	S_80	FS2911	diameterBreastHeight	11
MaS5	S_80	FS2912	diameterBreastHeight	18.5
MaS5	S_80	FS2913	diameterBreastHeight	20
PaO4	S_81	FS2971	diameterBreastHeight	62.3
MaO3	S_82	FS2781	diameterBreastHeight	20
MaS1	S_82	FS2841	diameterBreastHeight	61
MaS1	S_82	FS2842	diameterBreastHeight	7.2
MaS1	S_82	FS2843	diameterBreastHeight	6.6
MaS1	S_82	FS2844	diameterBreastHeight	9
MaS1	S_82	FS2845	diameterBreastHeight	6.2
MaS1	S_82	FS2846	diameterBreastHeight	10.5
MaS1	S_82	FS2847	diameterBreastHeight	11.6
MaS1	S_82	FS2848	diameterBreastHeight	10.3
MaS1	S_82	FS2849	diameterBreastHeight	5.8
MaS1	S_82	FS2850	diameterBreastHeight	7.5
MaS1	S_82	FS2851	diameterBreastHeight	6.8
MaS1	S_82	FS2852	diameterBreastHeight	15.5
MaS1	S_82	FS2853	diameterBreastHeight	15.5
MaS1	S_82	FS2854	diameterBreastHeight	9.8
MaS3	S_82	FS2889	diameterBreastHeight	33.5
MaS3	S_82	FS2890	diameterBreastHeight	7.6
MaS4	S_82	FS2907	diameterBreastHeight	12.2
MaS4	S_82	FS2908	diameterBreastHeight	18.7
MaS4	S_82	FS2909	diameterBreastHeight	10.1
ChD1	S_83	FS792	diameterBreastHeight	35
ChO1	S_83	FS822	diameterBreastHeight	28.3
ChD4	S_83	FS859	diameterBreastHeight	12.5
ChO2	S_83	FS877	diameterBreastHeight	6.3
ChO2	S_83	FS883	diameterBreastHeight	16.2
ChO2	S_83	FS894	diameterBreastHeight	6.4
ChO2	S_83	FS900	diameterBreastHeight	8.8
ChO3	S_83	FS953	diameterBreastHeight	7
ChO3	S_83	FS954	diameterBreastHeight	15.5
ChO4	S_83	FS992	diameterBreastHeight	7
ChO4	S_83	FS993	diameterBreastHeight	6
ChO4	S_83	FS994	diameterBreastHeight	10
ChO5	S_83	FS1011	diameterBreastHeight	7
ChO5	S_83	FS1020	diameterBreastHeight	7
ChO5	S_83	FS1021	diameterBreastHeight	7
ChO5	S_83	FS1022	diameterBreastHeight	5.5
ChO5	S_83	FS1023	diameterBreastHeight	6
ChO5	S_83	FS1024	diameterBreastHeight	5
ChO5	S_83	FS1025	diameterBreastHeight	5.5
ChO5	S_83	FS1028	diameterBreastHeight	14.5
ChO5	S_83	FS1040	diameterBreastHeight	12
ChO5	S_83	FS1042	diameterBreastHeight	13
ChS3	S_83	FS1080	diameterBreastHeight	8.3
ChS3	S_83	FS1099	diameterBreastHeight	11.7
ChS4	S_83	FS1120	diameterBreastHeight	5.9
ChS4	S_83	FS1134	diameterBreastHeight	14.5
ChS4	S_83	FS1135	diameterBreastHeight	54.4
ChS4	S_83	FS1142	diameterBreastHeight	10
ChS5	S_83	FS1167	diameterBreastHeight	15.3
ChD5	S_83	FS1194	diameterBreastHeight	12
PaD3	S_83	FS3098	diameterBreastHeight	8
PaD3	S_83	FS3102	diameterBreastHeight	6
PaD2	S_83	FS3152	diameterBreastHeight	12.5
PaD2	S_83	FS3163	diameterBreastHeight	11.3
PaD2	S_83	FS3173	diameterBreastHeight	10
PaD2	S_83	FS3192	diameterBreastHeight	5.4
PaD2	S_83	FS3211	diameterBreastHeight	9
PaD2	S_83	FS3212	diameterBreastHeight	7.5
PaD1	S_83	FS3218	diameterBreastHeight	8.5
PaD1	S_83	FS3219	diameterBreastHeight	6
PaD1	S_83	FS3220	diameterBreastHeight	8
PaD5	S_83	FS3274	diameterBreastHeight	13
PaD5	S_83	FS3281	diameterBreastHeight	12
PaD4	S_83	FS3317	diameterBreastHeight	13.3
CaS3	S_84	FS530	diameterBreastHeight	14.5
CaS3	S_84	FS533	diameterBreastHeight	10.8
CaS3	S_84	FS543	diameterBreastHeight	7.7
CaS3	S_84	FS554	diameterBreastHeight	17.2
CaS3	S_84	FS555	diameterBreastHeight	13.5
CaS3	S_84	FS556	diameterBreastHeight	9.5
CaS3	S_84	FS557	diameterBreastHeight	7.4
CaS3	S_84	FS558	diameterBreastHeight	25.8
CaS3	S_84	FS559	diameterBreastHeight	12.2
CaS3	S_84	FS563	diameterBreastHeight	6.2
CaS3	S_84	FS564	diameterBreastHeight	14.5
CaS3	S_84	FS565	diameterBreastHeight	12.2
CaS3	S_84	FS567	diameterBreastHeight	19.3
CaS3	S_84	FS568	diameterBreastHeight	18.5
CaS3	S_84	FS569	diameterBreastHeight	5.5
CaS3	S_84	FS572	diameterBreastHeight	6.1
CaS3	S_84	FS574	diameterBreastHeight	8.9
CaS3	S_84	FS575	diameterBreastHeight	11
CaS3	S_84	FS576	diameterBreastHeight	7
CaS3	S_84	FS578	diameterBreastHeight	5.4
CaS3	S_84	FS579	diameterBreastHeight	10
CaS3	S_84	FS585	diameterBreastHeight	11.1
CaS4	S_84	FS586	diameterBreastHeight	21
CaS4	S_84	FS589	diameterBreastHeight	15
CaS4	S_84	FS590	diameterBreastHeight	9
CaS4	S_84	FS591	diameterBreastHeight	14.8
CaS4	S_84	FS595	diameterBreastHeight	32.3
CaS4	S_84	FS596	diameterBreastHeight	14.6
CaS4	S_84	FS597	diameterBreastHeight	23.3
CaS4	S_84	FS601	diameterBreastHeight	7.6
CaS4	S_84	FS602	diameterBreastHeight	6.9
CaS4	S_84	FS603	diameterBreastHeight	12
CaS4	S_84	FS605	diameterBreastHeight	5.2
CaS4	S_84	FS607	diameterBreastHeight	7.2
[truncated: 7,104 more rows]
