# Supplementary material for: BIOVERA-Tree: tree diversity, community composition, forest structure and functional traits along gradients of forest-use intensity and elevation in Veracruz, Mexico
Source: Biodivers Data J. 2021 Sep 9;9:e69560. doi: 10.3897/BDJ.9.e69560 (PMC8445910; doi:10.3897/BDJ.9.e69560)
Supplement: Supplementary material 6 — BIOVERA-Tree metadata [file bdj-09-e69560-s006.csv]

According	Concept	Units	Definition
Darwin Core	country		The name of the country or major administrative unit in which the Location occurs.
Darwin Core	habitat		A category or description of the habitat in which the Event occurred.
Darwin Core	locationID		An identifier for the set of location information (data associated with dcterms:Location). May be a global unique identifier or an identifier specific to the data set.
Darwin Core	verbatimElevation		The original description of the elevation (altitude, usually above sea level) of the Location.
Darwin Core	verbatimLatitude		The verbatim original latitude of the Location.
Darwin Core	verbatimLongitude		The verbatim original longitude of the Location.
Darwin Core	family		The full scientific name of the family in which the taxon is classified.
Darwin Core	organismID		An identifier for the Organism instance (as opposed to a particular digital record of the Organism). May be a globally unique identifier or an identifier specific to the data set.
This research	treeIdentification		The full scientific name, with authorship and date information if known. When forming part of an Identification, this should be the name in lowest level taxonomic rank that can be determined.
This research	treeIdentificationID		An identifier for the tree name.
This research	roundElevation		We selected eight sites at approximately 500 m intervals along the elevational gradient between 30 and 3545 m; to simplify, we refer here to each site as elevation round . 0, 500, 1000, 1500, 2000, 2500, 3000, and 3500 m
This research	forestUseIntensity		Old growth forest (OF) a mature forest with low forest-use intensity, degraded forest (DF) classified as intermediate forest-use intensity, and secondary forest (SF) high forest-use intensity
This research	temperature	°C	Mean annual temperature
This research	precipitation	mm	Mean annual precipitation
This research	diameterBreastHeight	cm	Diameter at breast height
This research	height	m	the height of a whole tree
This research	resolution		Resolution at which the trait values is reported; leaf: trait value measured and reported at leaf level; organism: trait value measured and reported at individual level and; species: trait measured at individual level but reported as mean by species.
This research	heightGroup	m	it is the classification of trees into three groups: 1) species with more than 20 individuals, 2) species with between 5-19 individuals, and 3) species with less than five individuals.
This research	chlorophyllContent	µg cm-2	Chlorophyll content of leaves
Functional Diversity thesaurus	laminaDensity	g cm-3	leaf dry mass per leaf volume
Functional Diversity thesaurus	leafArea	cm2	the area (PATO:area) of a leaf (PO:leaf) in the one sided projection
Functional Diversity thesaurus	leafDryMatterContent	g g-1	the ratio of the dry mass of a leaf (TOP:leaf dry mass) to its water saturated fresh mass
Functional Diversity thesaurus	leafThickness	mm	ßthe thickness (PATO:thickness) of a leaf (PO:leaf)
This research	maximumHeight	m	We determined maximum tree height for each species
Functional Diversity thesaurus	specificLeafArea	m2 kg-1	the ratio of the area of a leaf (TOP:leaf area) to its dry mass (TOP:leaf dry mass)
Functional Diversity thesaurus	woodDensity	g cm-3	the ratio of the mass (PATO:mass) of a unit wood (PO:secondary xylem) of the stem (PO:stem) assessed after drying to its volume (PATO:volume) assessed without drying.
